# Supplementary material for: A de novo genome assembly of Solanum verrucosum Schlechtendal, a Mexican diploid species geographically isolated from other diploid A-genome species of potato relatives
Source: PubMed Central journal article supplement (PMC9339273; doi:10.1093/g3journal/jkac166), 2022-07-01
Supplement: jkac166_supplementary_figure_1.pdf [file jkac166_supplementary_figure_1.pdf]

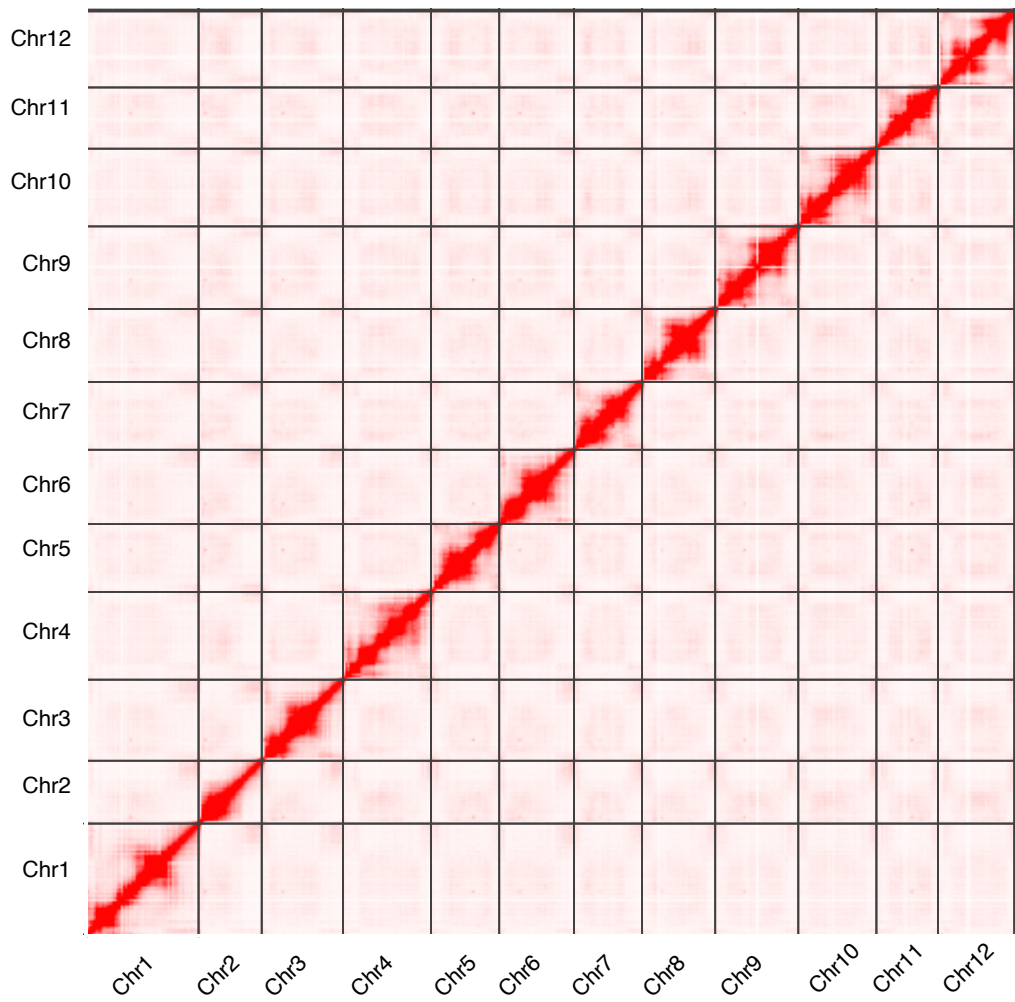

**Supplementary Figure 1** Hi-C contact map of *S. verrucosum* chromosomes. Color intensity indicates contact frequency.
