# Supplementary material for: A de novo genome assembly of Solanum verrucosum Schlechtendal, a Mexican diploid species geographically isolated from other diploid A-genome species of potato relatives
Source: PubMed Central journal article supplement (PMC9339273; doi:10.1093/g3journal/jkac166), 2022-07-01
Supplement: jkac166_supplementary_figure_2.pdf [file jkac166_supplementary_figure_2.pdf]

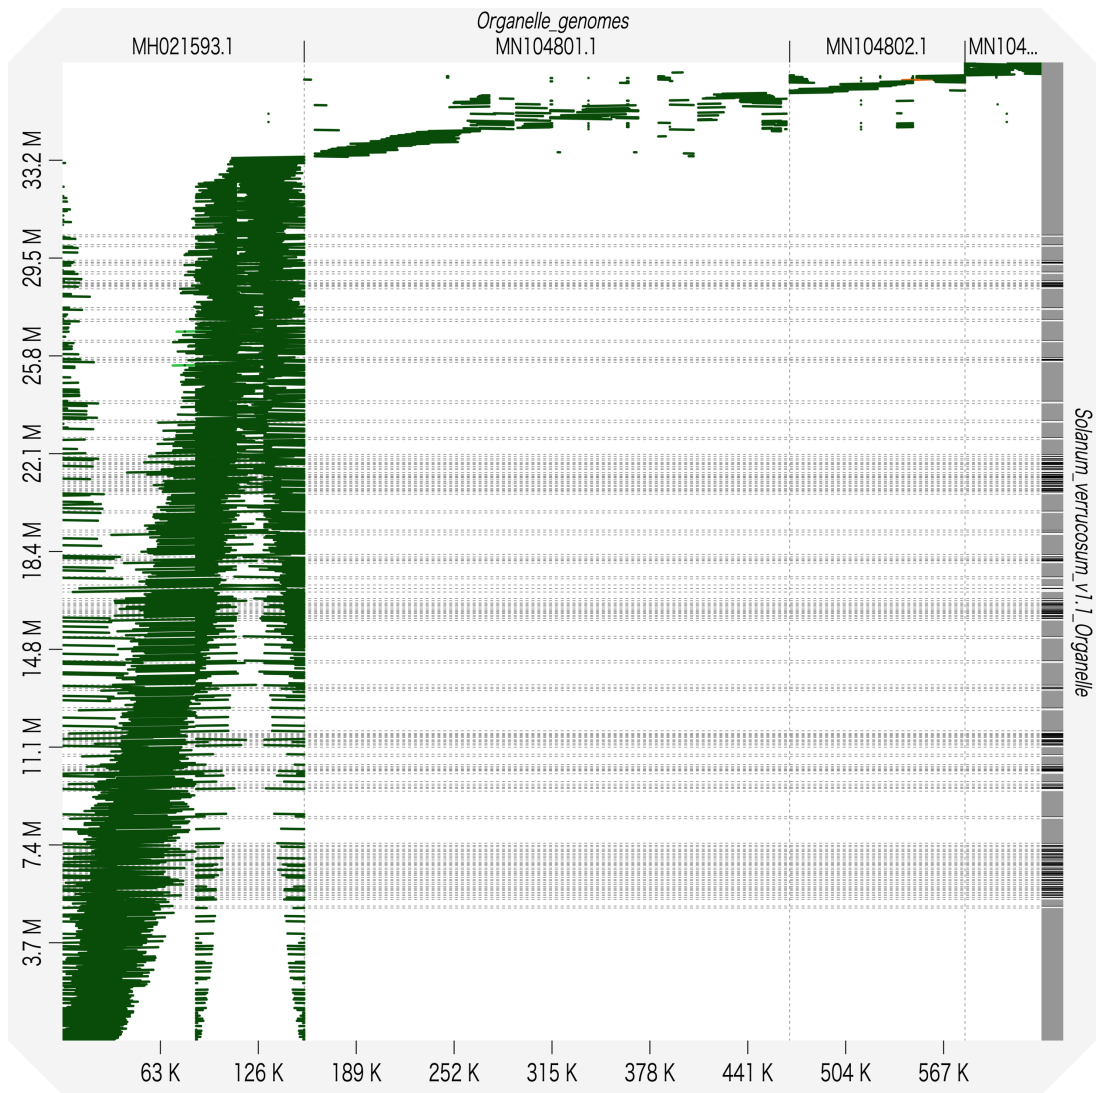

**Supplementary Figure 2** Dot plot of *S. verrucosum* chloroplast genome (MH021593.1; Huang *et al.* 2019) and *S. tuberosum* cv. Désirée (MN104801, MN104802, and MN104803; Varré *et al.* 2019) mitochondrial genome against *S. verrucosum* contigs.
