# Supplementary material for: A de novo genome assembly of Solanum verrucosum Schlechtendal, a Mexican diploid species geographically isolated from other diploid A-genome species of potato relatives
Source: PubMed Central journal article supplement (PMC9339273; doi:10.1093/g3journal/jkac166), 2022-07-01
Supplement: jkac166_supplementary_figure_3.pdf [file jkac166_supplementary_figure_3.pdf]

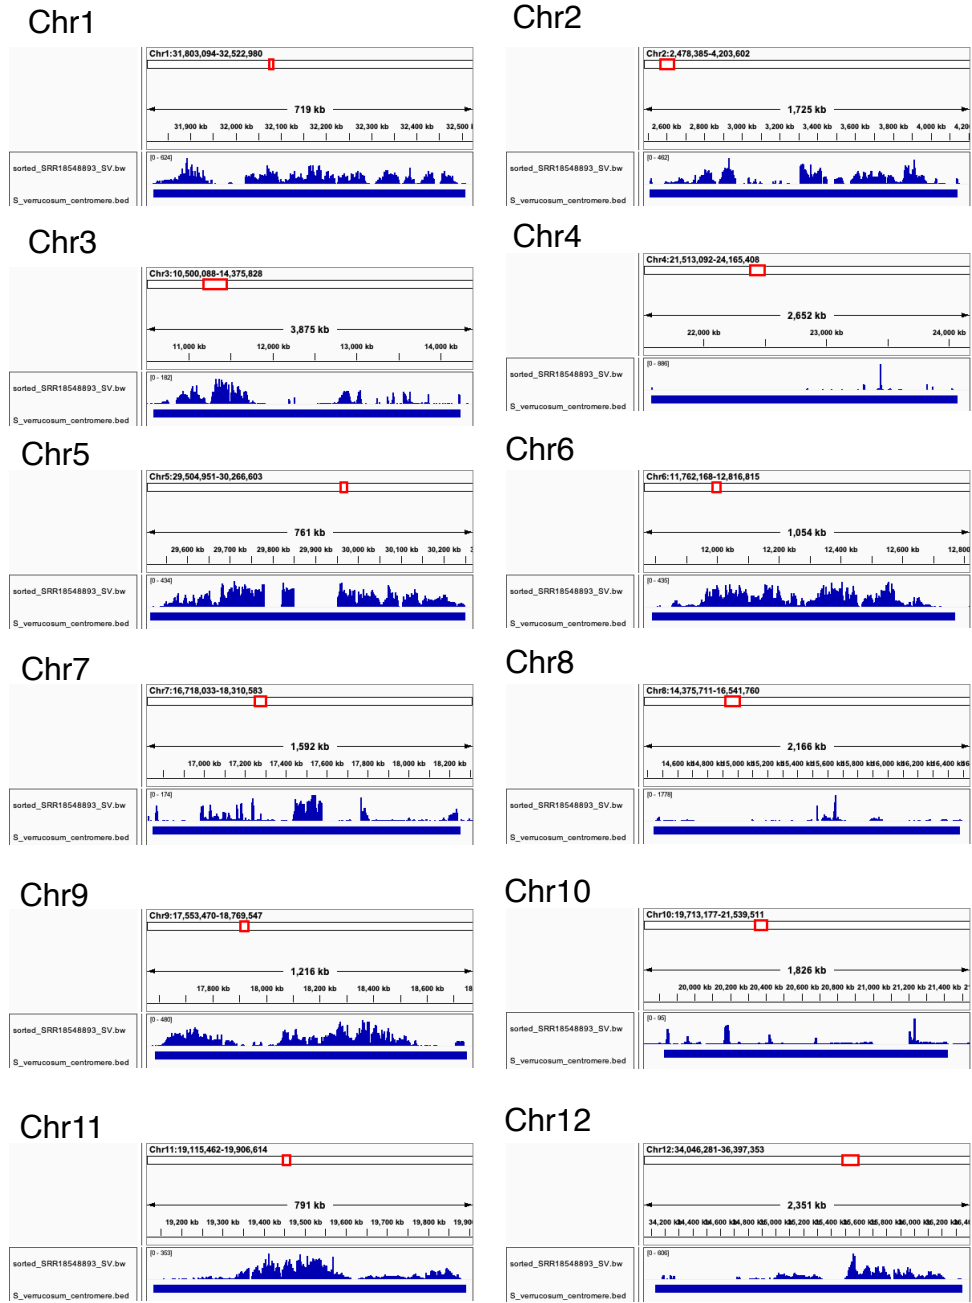

**Supplementary Figure 3** ChIP-seq alignments in *S. verrucosum*. Bar charts indicate coverages of ChIP-seq against CENH3 protein. Blue boxes shown below are the defined centromere regions.
