# Supplementary material for: A de novo genome assembly of Solanum verrucosum Schlechtendal, a Mexican diploid species geographically isolated from other diploid A-genome species of potato relatives
Source: PubMed Central journal article supplement (PMC9339273; doi:10.1093/g3journal/jkac166), 2022-07-01
Supplement: jkac166_supplementary_figure_4.pdf [file jkac166_supplementary_figure_4.pdf]

*S. phureja*

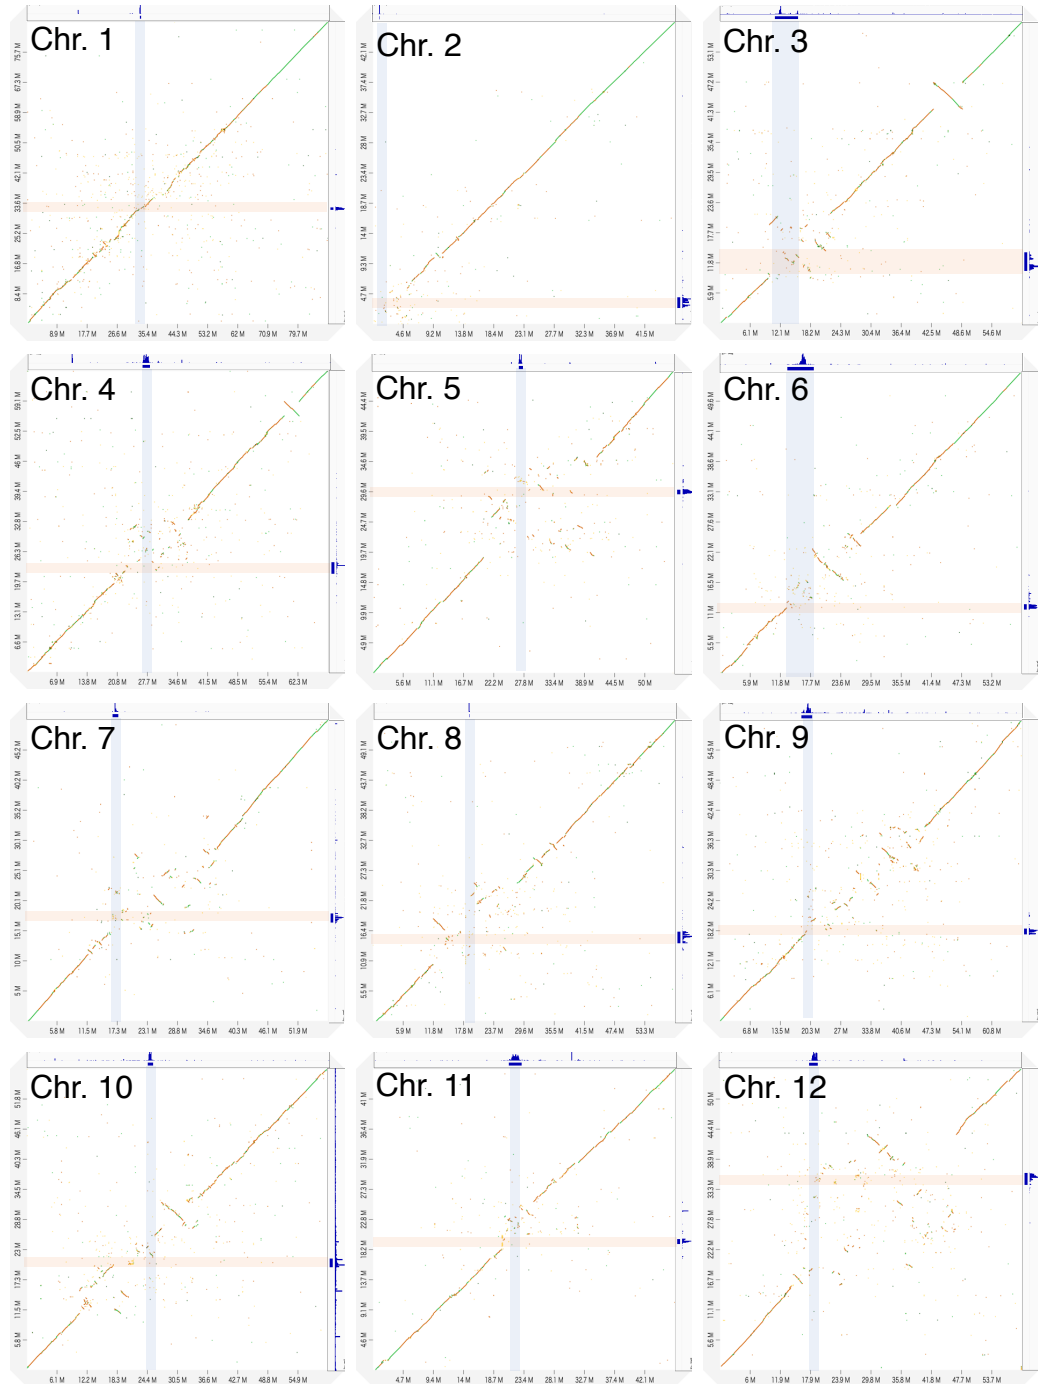

**Supplementary Figure 4** Dot plots between *S. verrucosum* and *S. phureja*. ChIP-seq signals against CENH3 protein of *S. verrucosum* and *S. phureja* were shown at right and top of the plot, and highlighted in blue and orange, respectively.
