# Supplementary material for: A de novo genome assembly of Solanum verrucosum Schlechtendal, a Mexican diploid species geographically isolated from other diploid A-genome species of potato relatives
Source: G3 (Bethesda). 2022 Jul 1;12(8):jkac166. doi: 10.1093/g3journal/jkac166 (PMC9339273; doi:10.1093/g3journal/jkac166)
Supplement: jkac166_Supplemetary_File_1 [file jkac166_supplemetary_file_1.xlsx]

## Sheet: Sheet1
Supplementary File 1 Characteristics of the constructed contigs
ID	Category	length	gene	TE		Category	Count	length			gene	TE	length
Chr1	Chromosome	84109000	0.240902	0.581448		Chromosome	12	683977243		Chr1	24.09	58.14	84109000
Chr2	Chromosome	46727947	0.293607	0.857616		chloroplast	688	33338007		Chr2	29.36	85.76	46727947
Chr3	Chromosome	58981818	0.249461	0.64395		mitochondria	102	3560863		Chr3	24.95	64.39	58981818
Chr4	Chromosome	65655322	0.221034	0.515242		Unanchored	745	59362576		Chr4	22.1	51.52	65655322
Chr5	Chromosome	49370500	0.218608	0.75715						Chr5	21.86	75.71	49370500
Chr6	Chromosome	55157000	0.238713	0.651442						Chr6	23.87	65.14	55157000
Chr7	Chromosome	50238081	0.224975	0.645893						Chr7	22.5	64.59	50238081
Chr8	Chromosome	54563706	0.216802	0.612594						Chr8	21.68	61.26	54563706
Chr9	Chromosome	60548446	0.204299	0.495018						Chr9	20.43	49.5	60548446
Chr10	Chromosome	57571353	0.192439	0.524742						Chr10	19.24	52.47	57571353
Chr11	Chromosome	45502451	0.249516	0.533065						Chr11	24.95	53.31	45502451
Chr12	Chromosome	55551619	0.201085	0.481621						Chr12	20.11	48.16	55551619
Unanchored_70	chloroplast	137124	0.370055	0.503355						Unanchored	21.4	88.55	59362576
Unanchored_75	chloroplast	128360	0.406095	0.493035
Unanchored_88	chloroplast	110746	0.389661	0.464044
Unanchored_90	chloroplast	107768	0.40286	0.461306
Unanchored_93	chloroplast	106899	0.370839	0.474794
Unanchored_95	chloroplast	103506	0.353973	0.517236
Unanchored_99	chloroplast	102385	0.360896	0.49309
Unanchored_106	chloroplast	97536	0.353975	0.559916
Unanchored_107	chloroplast	97250	0.460046	0.467136
Unanchored_113	chloroplast	95273	0.386525	0.497434
Unanchored_114	chloroplast	94924	0.376811	0.478098
Unanchored_115	chloroplast	94654	0.399776	0.479314
Unanchored_119	chloroplast	90858	0.369019	0.542033
Unanchored_120	chloroplast	90163	0.37508	0.513725
Unanchored_121	chloroplast	89982	0.361154	0.494521
Unanchored_122	chloroplast	89784	0.364579	0.511795
Unanchored_123	chloroplast	89131	0.362605	0.494968
Unanchored_125	chloroplast	88207	0.321962	0.536908
Unanchored_127	chloroplast	86523	0.4284	0.490124
Unanchored_129	chloroplast	86318	0.326077	0.49854
Unanchored_132	chloroplast	85675	0.348355	0.494788
Unanchored_133	chloroplast	85632	0.278299	0.510358
Unanchored_134	chloroplast	85257	0.433659	0.465862
Unanchored_135	chloroplast	85196	0.341018	0.491267
Unanchored_136	chloroplast	85132	0.424769	0.469166
Unanchored_137	chloroplast	84537	0.419324	0.398122
Unanchored_138	chloroplast	84434	0.408916	0.501765
Unanchored_139	chloroplast	84296	0.470977	0.451386
Unanchored_140	chloroplast	84296	0.357578	0.488813
Unanchored_141	chloroplast	84234	0.526041	0.427535
Unanchored_143	chloroplast	83985	0.319001	0.506852
Unanchored_144	chloroplast	83961	0.298261	0.497481
Unanchored_146	chloroplast	83905	0.400088	0.437662
Unanchored_147	chloroplast	83827	0.324553	0.536188
Unanchored_150	chloroplast	83220	0.316743	0.528599
Unanchored_151	chloroplast	83053	0.395535	0.497056
Unanchored_152	chloroplast	82858	0.389913	0.481776
Unanchored_153	chloroplast	82637	0.343724	0.476421
Unanchored_154	chloroplast	82127	0.407593	0.502222
Unanchored_156	chloroplast	81191	0.300616	0.504231
Unanchored_159	chloroplast	80591	0.336382	0.464903
Unanchored_160	chloroplast	80038	0.369242	0.476449
Unanchored_161	chloroplast	78797	0.379207	0.427402
Unanchored_162	chloroplast	78736	0.290786	0.536692
Unanchored_163	chloroplast	78636	0.401666	0.454436
Unanchored_168	chloroplast	77768	0.433037	0.464407
Unanchored_169	chloroplast	77645	0.34957	0.492743
Unanchored_170	chloroplast	77545	0.361047	0.5173
Unanchored_171	chloroplast	77460	0.514879	0.470966
Unanchored_172	chloroplast	77362	0.256085	0.538262
Unanchored_173	chloroplast	77311	0.385474	0.437751
Unanchored_176	chloroplast	76488	0.327677	0.456411
Unanchored_177	chloroplast	76335	0.415149	0.444108
Unanchored_178	chloroplast	76324	0.381445	0.517871
Unanchored_184	chloroplast	75839	0.465334	0.443809
Unanchored_185	chloroplast	75666	0.379674	0.499313
Unanchored_186	chloroplast	75588	0.367801	0.525229
Unanchored_187	chloroplast	75509	0.371696	0.487518
Unanchored_188	chloroplast	75470	0.351654	0.443567
Unanchored_189	chloroplast	75105	0.398874	0.514919
Unanchored_190	chloroplast	74901	0.338545	0.465535
Unanchored_191	chloroplast	74897	0.248117	0.537204
Unanchored_192	chloroplast	74712	0.417663	0.444775
Unanchored_193	chloroplast	74624	0.343259	0.512931
Unanchored_195	chloroplast	74147	0.367896	0.499103
Unanchored_196	chloroplast	73547	0.361665	0.507607
Unanchored_202	chloroplast	72591	0.422482	0.455346
Unanchored_203	chloroplast	71880	0.236745	0.549235
Unanchored_206	chloroplast	71479	0.449397	0.483107
Unanchored_207	chloroplast	71407	0.384239	0.492081
Unanchored_208	chloroplast	71241	0.367785	0.513384
Unanchored_209	chloroplast	71186	0.40111	0.511027
Unanchored_210	chloroplast	71105	0.248776	0.541692
Unanchored_212	chloroplast	70633	0.391848	0.510569
Unanchored_213	chloroplast	70273	0.427197	0.487541
Unanchored_214	chloroplast	70001	0.442157	0.467993
Unanchored_218	chloroplast	69716	0.372689	0.471154
Unanchored_219	chloroplast	69296	0.442139	0.395997
Unanchored_221	chloroplast	68622	0.373078	0.4717
Unanchored_222	chloroplast	68515	0.384257	0.461417
Unanchored_224	chloroplast	68131	0.320123	0.469771
Unanchored_225	chloroplast	67945	0.458922	0.40889
Unanchored_227	chloroplast	67773	0.250782	0.543845
Unanchored_228	chloroplast	67738	0.400889	0.509537
Unanchored_229	chloroplast	67631	0.420331	0.55062
Unanchored_230	chloroplast	67630	0.3796	0.501419
Unanchored_231	chloroplast	67553	0.287749	0.477388
Unanchored_232	chloroplast	67512	0.346995	0.54571
Unanchored_233	chloroplast	67289	0.427937	0.494732
Unanchored_234	chloroplast	67284	0.392477	0.504607
Unanchored_235	chloroplast	67221	0.455921	0.474777
Unanchored_237	chloroplast	67115	0.331108	0.490144
Unanchored_241	chloroplast	66549	0.374887	0.445551
Unanchored_242	chloroplast	66458	0.340461	0.4887
Unanchored_244	chloroplast	66260	0.235576	0.486991
Unanchored_246	chloroplast	66248	0.455583	0.483773
Unanchored_247	chloroplast	66122	0.379804	0.492226
Unanchored_249	chloroplast	65810	0.318513	0.552652
Unanchored_250	chloroplast	65579	0.41	0.475274
Unanchored_251	chloroplast	65346	0.318938	0.460962
Unanchored_252	chloroplast	65018	0.440516	0.473207
Unanchored_255	chloroplast	64541	0.385621	0.486048
Unanchored_256	chloroplast	64538	0.424299	0.476758
Unanchored_258	chloroplast	64520	0.306266	0.509842
Unanchored_259	chloroplast	64500	0.447464	0.391101
Unanchored_262	chloroplast	63510	0.347982	0.456054
Unanchored_263	chloroplast	63492	0.441133	0.479856
Unanchored_264	chloroplast	63348	0.48217	0.445239
Unanchored_266	chloroplast	63176	0.447408	0.38274
Unanchored_267	chloroplast	62907	0.408276	0.485415
Unanchored_268	chloroplast	62619	0.390095	0.478018
Unanchored_269	chloroplast	62591	0.36656	0.489399
Unanchored_270	chloroplast	62139	0.440294	0.477317
Unanchored_271	chloroplast	61991	0.341926	0.514171
Unanchored_272	chloroplast	61805	0.342599	0.511997
Unanchored_273	chloroplast	61657	0.332117	0.587979
Unanchored_274	chloroplast	61600	0.257098	0.509091
Unanchored_275	chloroplast	61576	0.332732	0.509111
Unanchored_276	chloroplast	61568	0.304156	0.513546
Unanchored_277	chloroplast	61533	0.40418	0.490339
Unanchored_279	chloroplast	61429	0.385069	0.468362
Unanchored_280	chloroplast	61384	0.415148	0.484426
Unanchored_281	chloroplast	61357	0.421996	0.458888
Unanchored_282	chloroplast	61202	0.365288	0.554524
Unanchored_283	chloroplast	61172	0.370355	0.498431
Unanchored_284	chloroplast	60978	0.420093	0.483814
Unanchored_286	chloroplast	60742	0.358621	0.484953
Unanchored_287	chloroplast	60518	0.426029	0.469579
Unanchored_288	chloroplast	60481	0.414964	0.501066
Unanchored_289	chloroplast	60447	0.333074	0.510083
Unanchored_290	chloroplast	60432	0.466118	0.486464
Unanchored_292	chloroplast	60355	0.287239	0.514009
Unanchored_296	chloroplast	60200	0.511952	0.37211
Unanchored_298	chloroplast	60000	0.427807	0.474117
Unanchored_299	chloroplast	59968	0.388847	0.479939
Unanchored_301	chloroplast	59807	0.271244	0.506847
Unanchored_302	chloroplast	59411	0.45462	0.420141
Unanchored_305	chloroplast	59168	0.38126	0.495116
Unanchored_306	chloroplast	59087	0.322428	0.552575
Unanchored_308	chloroplast	59016	0.390358	0.4868
Unanchored_310	chloroplast	58812	0.419224	0.504268
Unanchored_313	chloroplast	58573	0.431145	0.461544
Unanchored_314	chloroplast	58417	0.405694	0.445812
Unanchored_317	chloroplast	58291	0.343369	0.574051
Unanchored_318	chloroplast	58208	0.301905	0.606034
Unanchored_321	chloroplast	57920	0.351197	0.489209
Unanchored_322	chloroplast	57742	0.219671	0.503879
Unanchored_323	chloroplast	57442	0.348427	0.568574
Unanchored_325	chloroplast	57296	0.385426	0.520717
Unanchored_326	chloroplast	57284	0.32837	0.510753
Unanchored_327	chloroplast	57222	0.344786	0.5144
Unanchored_328	chloroplast	57017	0.403396	0.389042
Unanchored_329	chloroplast	56774	0.441583	0.465407
Unanchored_330	chloroplast	56763	0.427998	0.462854
Unanchored_331	chloroplast	56698	0.312486	0.533493
Unanchored_334	chloroplast	56445	0.34707	0.511631
Unanchored_335	chloroplast	56396	0.353045	0.551103
Unanchored_336	chloroplast	56339	0.333203	0.528888
Unanchored_338	chloroplast	56102	0.368995	0.520659
Unanchored_339	chloroplast	56068	0.293881	0.51912
Unanchored_340	chloroplast	55979	0.342527	0.577592
Unanchored_341	chloroplast	55979	0.390868	0.459976
Unanchored_342	chloroplast	55767	0.384087	0.5365
Unanchored_344	chloroplast	55595	0.471598	0.435705
Unanchored_346	chloroplast	55468	0.285737	0.499982
Unanchored_347	chloroplast	55386	0.341573	0.510689
Unanchored_348	chloroplast	55385	0.447674	0.420294
Unanchored_349	chloroplast	55144	0.404167	0.486581
Unanchored_350	chloroplast	55043	0.372715	0.496848
Unanchored_351	chloroplast	55034	0.314956	0.505306
Unanchored_352	chloroplast	55024	0.312942	0.573877
Unanchored_353	chloroplast	54987	0.373695	0.507902
Unanchored_354	chloroplast	54907	0.315339	0.504125
Unanchored_355	chloroplast	54900	0.330389	0.468798
Unanchored_358	chloroplast	54624	0.286637	0.508915
Unanchored_359	chloroplast	54591	0.318886	0.582972
Unanchored_360	chloroplast	54290	0.314134	0.578541
Unanchored_361	chloroplast	54231	0.411027	0.519408
Unanchored_363	chloroplast	54191	0.4852	0.452252
Unanchored_364	chloroplast	54166	0.264396	0.507625
Unanchored_365	chloroplast	54126	0.372139	0.580756
Unanchored_368	chloroplast	54003	0.412614	0.457419
Unanchored_370	chloroplast	53842	0.379599	0.471249
Unanchored_372	chloroplast	53779	0.338354	0.569349
Unanchored_373	chloroplast	53724	0.409136	0.410729
Unanchored_376	chloroplast	53553	0.444671	0.428286
Unanchored_377	chloroplast	53527	0.430333	0.504288
Unanchored_378	chloroplast	53494	0.365132	0.41257
Unanchored_379	chloroplast	53364	0.28531	0.492448
Unanchored_380	chloroplast	53220	0.265262	0.501315
Unanchored_382	chloroplast	52902	0.369199	0.545083
Unanchored_384	chloroplast	52898	0.334896	0.504764
Unanchored_385	chloroplast	52795	0.402394	0.481049
Unanchored_387	chloroplast	52661	0.466635	0.456486
Unanchored_388	chloroplast	52609	0.467705	0.438936
Unanchored_390	chloroplast	52517	0.467629	0.408801
Unanchored_391	chloroplast	52510	0.323964	0.562293
Unanchored_393	chloroplast	52253	0.460978	0.4443
Unanchored_395	chloroplast	52062	0.454025	0.427817
Unanchored_396	chloroplast	52059	0.358389	0.506118
Unanchored_397	chloroplast	51982	0.38491	0.475472
Unanchored_398	chloroplast	51890	0.431247	0.45662
Unanchored_399	chloroplast	51806	0.368903	0.482415
Unanchored_401	chloroplast	51758	0.418398	0.420843
Unanchored_403	chloroplast	51633	0.352708	0.523328
Unanchored_404	chloroplast	51609	0.209173	0.576605
Unanchored_405	chloroplast	51579	0.464811	0.41102
Unanchored_407	chloroplast	51505	0.511087	0.46743
Unanchored_408	chloroplast	51443	0.488861	0.419455
Unanchored_411	chloroplast	51393	0.346435	0.49532
Unanchored_412	chloroplast	51344	0.422005	0.46504
Unanchored_413	chloroplast	51340	0.402287	0.491196
Unanchored_414	chloroplast	51194	0.460629	0.459663
Unanchored_415	chloroplast	51183	0.336251	0.570189
Unanchored_416	chloroplast	51127	0.424226	0.39439
Unanchored_417	chloroplast	51063	0.391563	0.513366
Unanchored_418	chloroplast	51028	0.344386	0.56079
Unanchored_421	chloroplast	50921	0.388158	0.466802
Unanchored_422	chloroplast	50879	0.369433	0.487372
Unanchored_423	chloroplast	50866	0.259982	0.573192
Unanchored_425	chloroplast	50766	0.403585	0.452567
Unanchored_426	chloroplast	50741	0.338904	0.481406
Unanchored_427	chloroplast	50616	0.469722	0.484313
Unanchored_428	chloroplast	50505	0.49802	0.403168
Unanchored_429	chloroplast	50418	0.286967	0.552818
Unanchored_433	chloroplast	50256	0.175386	0.55462
Unanchored_436	chloroplast	50127	0.405458	0.437369
Unanchored_440	chloroplast	49945	0.395082	0.443208
Unanchored_441	chloroplast	49891	0.291702	0.548836
Unanchored_442	chloroplast	49856	0.381707	0.482991
Unanchored_443	chloroplast	49811	0.428789	0.505651
Unanchored_445	chloroplast	49679	0.436129	0.435496
Unanchored_446	chloroplast	49672	0.39363	0.465655
Unanchored_447	chloroplast	49645	0.36371	0.442602
Unanchored_448	chloroplast	49634	0.383011	0.525849
Unanchored_452	chloroplast	49447	0.437083	0.481768
Unanchored_453	chloroplast	49425	0.366624	0.462559
Unanchored_454	chloroplast	49416	0.460022	0.447426
Unanchored_455	chloroplast	49399	0.397	0.435616
Unanchored_456	chloroplast	49347	0.332611	0.518856
Unanchored_458	chloroplast	49256	0.432159	0.471821
Unanchored_459	chloroplast	49123	0.380217	0.449464
Unanchored_461	chloroplast	48965	0.364166	0.514408
Unanchored_462	chloroplast	48952	0.416355	0.479286
Unanchored_463	chloroplast	48926	0.349351	0.515779
Unanchored_464	chloroplast	48902	0.285209	0.443377
Unanchored_465	chloroplast	48901	0.357157	0.515081
Unanchored_466	chloroplast	48883	0.350293	0.513369
Unanchored_470	chloroplast	48830	0.352885	0.515851
Unanchored_472	chloroplast	48647	0.418164	0.472383
Unanchored_473	chloroplast	48587	0.339727	0.5216
Unanchored_474	chloroplast	48518	0.390131	0.500927
Unanchored_476	chloroplast	48488	0.299441	0.512931
Unanchored_477	chloroplast	48473	0.181734	0.446682
Unanchored_478	chloroplast	48465	0.398646	0.402105
Unanchored_479	chloroplast	48414	0.353831	0.483682
Unanchored_480	chloroplast	48403	0.354944	0.579695
Unanchored_482	chloroplast	48388	0.327113	0.547698
Unanchored_483	chloroplast	48325	0.355827	0.467274
Unanchored_484	chloroplast	48307	0.470356	0.417227
Unanchored_487	chloroplast	48158	0.4319	0.44734
Unanchored_488	chloroplast	48115	0.323731	0.44749
Unanchored_489	chloroplast	48006	0.358525	0.486668
Unanchored_490	chloroplast	47990	0.397862	0.508773
Unanchored_492	chloroplast	47859	0.36719	0.574187
Unanchored_493	chloroplast	47842	0.308417	0.579533
Unanchored_494	chloroplast	47821	0.426642	0.439702
Unanchored_495	chloroplast	47802	0.244074	0.502657
Unanchored_496	chloroplast	47782	0.354409	0.478569
Unanchored_498	chloroplast	47769	0.354442	0.45293
Unanchored_499	chloroplast	47714	0.514682	0.388418
Unanchored_500	chloroplast	47665	0.443018	0.489374
Unanchored_501	chloroplast	47577	0.477068	0.442945
Unanchored_502	chloroplast	47565	0.38382	0.456029
Unanchored_504	chloroplast	47370	0.393316	0.44581
Unanchored_505	chloroplast	47357	0.512628	0.377241
Unanchored_506	chloroplast	47351	0.378289	0.441385
Unanchored_507	chloroplast	47344	0.346873	0.490178
Unanchored_508	chloroplast	47282	0.327658	0.490631
Unanchored_509	chloroplast	47223	0.465503	0.407937
Unanchored_510	chloroplast	47177	0.307656	0.569282
Unanchored_511	chloroplast	47169	0.521837	0.378723
Unanchored_513	chloroplast	47155	0.436209	0.453674
Unanchored_514	chloroplast	47147	0.425529	0.472437
Unanchored_515	chloroplast	47141	0.375371	0.46607
Unanchored_516	chloroplast	47100	0.397163	0.500764
Unanchored_517	chloroplast	47089	0.415265	0.559727
Unanchored_518	chloroplast	47006	0.410573	0.490044
Unanchored_519	chloroplast	47000	0.356114	0.551681
Unanchored_520	chloroplast	46976	0.325641	0.515689
Unanchored_525	chloroplast	46854	0.348046	0.464187
Unanchored_528	chloroplast	46818	0.462097	0.421974
Unanchored_529	chloroplast	46796	0.377861	0.533058
Unanchored_531	chloroplast	46739	0.23897	0.521962
Unanchored_532	chloroplast	46736	0.33936	0.490029
Unanchored_533	chloroplast	46689	0.376564	0.489751
Unanchored_535	chloroplast	46641	0.384627	0.468386
Unanchored_537	chloroplast	46574	0.444227	0.46556
Unanchored_539	chloroplast	46539	0.3628	0.461398
Unanchored_540	chloroplast	46497	0.297337	0.506699
Unanchored_541	chloroplast	46429	0.228311	0.505568
Unanchored_542	chloroplast	46419	0.47139	0.464465
Unanchored_543	chloroplast	46413	0.462596	0.43421
Unanchored_544	chloroplast	46373	0.516971	0.389063
Unanchored_545	chloroplast	46367	0.404887	0.543231
Unanchored_547	chloroplast	46236	0.451455	0.456571
Unanchored_548	chloroplast	46231	0.303937	0.480392
Unanchored_549	chloroplast	46222	0.380779	0.567695
Unanchored_551	chloroplast	46195	0.424579	0.427665
Unanchored_552	chloroplast	46181	0.209528	0.542929
Unanchored_553	chloroplast	46125	0.308668	0.546125
Unanchored_554	chloroplast	46118	0.304682	0.51778
Unanchored_555	chloroplast	46053	0.447603	0.47606
Unanchored_556	chloroplast	46039	0.386594	0.516345
Unanchored_557	chloroplast	45962	0.387241	0.514294
Unanchored_558	chloroplast	45914	0.301222	0.52692
Unanchored_559	chloroplast	45887	0.41468	0.558524
Unanchored_561	chloroplast	45795	0.284797	0.560585
Unanchored_562	chloroplast	45755	0.380404	0.480407
Unanchored_565	chloroplast	45618	0.426179	0.471853
Unanchored_566	chloroplast	45579	0.358046	0.463262
Unanchored_568	chloroplast	45534	0.354688	0.912241
Unanchored_572	chloroplast	45514	0.371103	0.471306
Unanchored_574	chloroplast	45462	0.379204	0.470151
Unanchored_576	chloroplast	45458	0.485074	0.392978
Unanchored_579	chloroplast	45417	0.27596	0.558756
Unanchored_580	chloroplast	45407	0.302053	0.562468
Unanchored_581	chloroplast	45293	0.406231	0.514892
Unanchored_584	chloroplast	45192	0.543272	0.367919
Unanchored_585	chloroplast	45151	0.424097	0.439282
Unanchored_586	chloroplast	45126	0.527291	0.374463
Unanchored_587	chloroplast	45113	0.400071	0.467426
Unanchored_588	chloroplast	45100	0.19251	0.493348
Unanchored_589	chloroplast	45074	0.427396	0.467276
Unanchored_590	chloroplast	45031	0.439152	0.429948
Unanchored_591	chloroplast	45024	0.222086	0.523077
Unanchored_592	chloroplast	45022	0.39506	0.438652
Unanchored_594	chloroplast	44893	0.523724	0.384381
Unanchored_596	chloroplast	44887	0.399078	0.458284
Unanchored_597	chloroplast	44848	0.390528	0.47875
Unanchored_601	chloroplast	44750	0.548772	0.357184
Unanchored_602	chloroplast	44690	0.374992	0.454196
Unanchored_603	chloroplast	44678	0.421805	0.411769
Unanchored_605	chloroplast	44671	0.372442	0.548812
Unanchored_606	chloroplast	44662	0.221871	0.578837
Unanchored_607	chloroplast	44603	0.541926	0.366478
Unanchored_609	chloroplast	44519	0.440047	0.466857
Unanchored_610	chloroplast	44498	0.261456	0.573059
Unanchored_613	chloroplast	44437	0.228418	0.47969
Unanchored_614	chloroplast	44400	0.540936	0.371599
Unanchored_615	chloroplast	44331	0.284818	0.549503
Unanchored_617	chloroplast	44193	0.355856	0.46711
Unanchored_618	chloroplast	44182	0.316267	0.591417
Unanchored_619	chloroplast	44143	0.420846	0.468704
Unanchored_621	chloroplast	44111	0.473747	0.46578
Unanchored_622	chloroplast	44048	0.404068	0.530739
Unanchored_623	chloroplast	44038	0.353521	0.435828
Unanchored_625	chloroplast	43987	0.436025	0.458135
Unanchored_626	chloroplast	43950	0.353205	0.502048
Unanchored_627	chloroplast	43948	0.315903	0.481296
Unanchored_629	chloroplast	43842	0.265528	0.562132
Unanchored_630	chloroplast	43806	0.409611	0.406269
Unanchored_631	chloroplast	43739	0.444579	0.366241
Unanchored_633	chloroplast	43614	0.380735	0.472601
Unanchored_635	chloroplast	43486	0.31328	0.582187
Unanchored_636	chloroplast	43480	0.287495	0.584568
Unanchored_637	chloroplast	43466	0.376671	0.461004
Unanchored_638	chloroplast	43464	0.323286	0.484884
Unanchored_639	chloroplast	43428	0.45101	0.414318
Unanchored_640	chloroplast	43399	0.396263	0.469942
Unanchored_641	chloroplast	43378	0.385827	0.551409
Unanchored_642	chloroplast	43327	0.312468	0.481386
Unanchored_643	chloroplast	43321	0.342382	0.462755
Unanchored_649	chloroplast	43153	0.420931	0.462401
Unanchored_652	chloroplast	43064	0.368553	0.453488
Unanchored_653	chloroplast	42978	0.391326	0.535413
Unanchored_654	chloroplast	42973	0.395071	0.531008
Unanchored_655	chloroplast	42966	0.387478	0.458432
Unanchored_656	chloroplast	42927	0.420724	0.415077
Unanchored_657	chloroplast	42923	0.29055	0.47718
Unanchored_659	chloroplast	42911	0.421114	0.438396
Unanchored_660	chloroplast	42870	0.421143	0.417565
Unanchored_661	chloroplast	42866	0.38059	0.435053
Unanchored_663	chloroplast	42759	0.450816	0.436025
Unanchored_667	chloroplast	42671	0.392172	0.543999
Unanchored_669	chloroplast	42650	0.366878	0.446659
Unanchored_671	chloroplast	42610	0.396818	0.447055
Unanchored_673	chloroplast	42584	0.336261	0.483867
Unanchored_674	chloroplast	42501	0.390635	0.525846
Unanchored_676	chloroplast	42445	0.425408	0.47836
Unanchored_677	chloroplast	42418	0.452955	0.461479
Unanchored_679	chloroplast	42376	0.389522	0.552601
Unanchored_680	chloroplast	42299	0.395716	0.517435
Unanchored_681	chloroplast	42298	0.405159	0.416024
Unanchored_682	chloroplast	42262	0.406663	0.455208
Unanchored_683	chloroplast	42261	0.356389	0.45148
Unanchored_686	chloroplast	42130	0.352797	0.551199
Unanchored_687	chloroplast	42124	0.378249	0.506481
Unanchored_688	chloroplast	42043	0.541221	0.552149
Unanchored_689	chloroplast	42015	0.316442	0.589266
Unanchored_691	chloroplast	41922	0.395315	0.448285
Unanchored_692	chloroplast	41922	0.47215	0.562354
Unanchored_693	chloroplast	41920	0.195114	0.57593
Unanchored_694	chloroplast	41885	0.415576	0.476782
Unanchored_697	chloroplast	41803	0.334218	0.574074
Unanchored_701	chloroplast	41731	0.415289	0.40416
Unanchored_702	chloroplast	41727	0.240737	0.481151
Unanchored_703	chloroplast	41708	0.302227	0.597967
Unanchored_704	chloroplast	41679	0.375642	0.519518
Unanchored_706	chloroplast	41663	0.277087	0.598781
Unanchored_708	chloroplast	41579	0.443744	0.448399
Unanchored_709	chloroplast	41568	0.399451	0.460859
Unanchored_710	chloroplast	41557	0.349264	0.564021
Unanchored_713	chloroplast	41530	0.422259	0.459186
Unanchored_714	chloroplast	41526	0.297893	0.453282
Unanchored_716	chloroplast	41507	0.226401	0.549618
Unanchored_720	chloroplast	41345	0.27738	0.562438
Unanchored_721	chloroplast	41339	0.33843	0.521566
Unanchored_722	chloroplast	41296	0.387141	0.455516
Unanchored_723	chloroplast	41282	0.302754	0.571314
Unanchored_726	chloroplast	41244	0.227845	0.528101
Unanchored_729	chloroplast	41058	0.354629	0.454162
Unanchored_733	chloroplast	40991	0.362893	0.460613
Unanchored_736	chloroplast	40943	0.388452	0.56862
Unanchored_737	chloroplast	40929	0.314504	0.433507
Unanchored_739	chloroplast	40916	0.435439	0.456887
Unanchored_743	chloroplast	40835	0.413601	0.512673
Unanchored_745	chloroplast	40760	0.351186	0.385967
Unanchored_746	chloroplast	40735	0.313694	0.460832
Unanchored_751	chloroplast	40633	0.311085	0.483499
Unanchored_752	chloroplast	40627	0.486733	0.416053
Unanchored_753	chloroplast	40452	0.387778	0.537773
Unanchored_756	chloroplast	40416	0.563083	0.35533
Unanchored_757	chloroplast	40416	0.287591	0.55822
Unanchored_758	chloroplast	40389	0.396578	0.44782
Unanchored_759	chloroplast	40372	0.415521	0.405207
Unanchored_761	chloroplast	40314	0.392528	0.560624
Unanchored_762	chloroplast	40276	0.464258	0.467499
Unanchored_763	chloroplast	40246	0.392247	0.451796
Unanchored_764	chloroplast	40169	0.462582	0.383057
Unanchored_766	chloroplast	40135	0.428315	0.485287
Unanchored_767	chloroplast	40114	0.308678	0.48068
Unanchored_772	chloroplast	40020	0.429671	0.449775
Unanchored_774	chloroplast	40000	0.299907	0.47845
Unanchored_776	chloroplast	39937	0.384866	0.466835
Unanchored_779	chloroplast	39820	0.295989	0.469538
Unanchored_780	chloroplast	39783	0.432231	0.455069
Unanchored_782	chloroplast	39775	0.253482	0.476606
Unanchored_785	chloroplast	39713	0.454674	0.445371
Unanchored_787	chloroplast	39708	0.448082	0.461947
Unanchored_789	chloroplast	39606	0.317359	0.624981
Unanchored_791	chloroplast	39576	0.389286	0.470512
Unanchored_792	chloroplast	39564	0.43475	0.424881
Unanchored_793	chloroplast	39518	0.396943	0.532238
Unanchored_794	chloroplast	39493	0.237263	0.567847
Unanchored_796	chloroplast	39477	0.360574	0.473643
Unanchored_797	chloroplast	39458	0.34184	0.464545
Unanchored_799	chloroplast	39433	0.407081	0.40527
Unanchored_803	chloroplast	39396	0.317274	0.573155
Unanchored_805	chloroplast	39325	0.453845	0.421462
Unanchored_809	chloroplast	39235	0.378473	0.575965
Unanchored_810	chloroplast	39205	0.390368	0.627496
Unanchored_812	chloroplast	39199	0.413516	0.520294
Unanchored_814	chloroplast	39183	0.320351	0.628793
Unanchored_815	chloroplast	39174	0.497971	0.392786
Unanchored_817	chloroplast	39096	0.319606	0.469204
Unanchored_818	chloroplast	39082	0.236432	0.540351
Unanchored_821	chloroplast	39034	0.445008	0.507865
Unanchored_822	chloroplast	39018	0.33429	0.549054
Unanchored_823	chloroplast	39014	0.424756	0.384247
Unanchored_826	chloroplast	38953	0.361239	0.478115
Unanchored_827	chloroplast	38941	0.402671	0.525539
Unanchored_829	chloroplast	38911	0.372989	0.559944
Unanchored_830	chloroplast	38899	0.430305	0.506543
Unanchored_831	chloroplast	38812	0.404164	0.524245
Unanchored_832	chloroplast	38766	0.347762	0.603209
Unanchored_835	chloroplast	38728	0.375087	0.481409
Unanchored_836	chloroplast	38724	0.144591	0.52758
Unanchored_837	chloroplast	38714	0.41973	0.45911
Unanchored_839	chloroplast	38659	0.381706	0.505988
Unanchored_840	chloroplast	38619	0.318297	0.583547
Unanchored_841	chloroplast	38614	0.294745	0.542446
Unanchored_842	chloroplast	38537	0.400872	0.477463
Unanchored_844	chloroplast	38464	0.416738	0.47538
Unanchored_846	chloroplast	38383	0.407926	0.433525
Unanchored_853	chloroplast	38306	0.422086	0.417298
Unanchored_856	chloroplast	38264	0.298356	0.440022
Unanchored_857	chloroplast	38244	0.329655	0.583412
Unanchored_859	chloroplast	38205	0.358889	0.422562
Unanchored_860	chloroplast	38181	0.426847	0.464053
Unanchored_864	chloroplast	38061	0.283001	0.64147
Unanchored_866	chloroplast	38016	0.287097	0.516598
Unanchored_867	chloroplast	37974	0.369078	0.455127
Unanchored_868	chloroplast	37954	0.355176	0.561575
Unanchored_869	chloroplast	37949	0.427111	0.437614
Unanchored_870	chloroplast	37918	0.418177	0.476739
Unanchored_871	chloroplast	37850	0.419509	0.386499
Unanchored_873	chloroplast	37754	0.390459	0.500636
Unanchored_874	chloroplast	37744	0.34213	0.616893
Unanchored_875	chloroplast	37742	0.338306	0.621085
Unanchored_877	chloroplast	37619	0.467781	0.434116
Unanchored_878	chloroplast	37583	0.24251	0.490408
Unanchored_879	chloroplast	37525	0.462451	0.461559
Unanchored_880	chloroplast	37517	0.394872	0.579311
Unanchored_881	chloroplast	37474	0.409948	0.474969
Unanchored_882	chloroplast	37449	0.43519	0.450559
Unanchored_883	chloroplast	37426	0.391824	0.442366
Unanchored_887	chloroplast	37311	0.422273	0.501327
Unanchored_888	chloroplast	37307	0.455664	0.469697
Unanchored_893	chloroplast	37206	0.273377	0.656426
Unanchored_894	chloroplast	37184	0.467095	0.453663
Unanchored_895	chloroplast	37154	0.254461	0.567584
Unanchored_896	chloroplast	37122	0.408771	0.431496
Unanchored_898	chloroplast	37120	0.410356	0.398491
Unanchored_901	chloroplast	37063	0.360288	0.475353
Unanchored_903	chloroplast	37033	0.414803	0.469878
Unanchored_904	chloroplast	36980	0.399037	0.486101
Unanchored_910	chloroplast	36817	0.426065	0.510063
Unanchored_911	chloroplast	36816	0.382616	0.498126
Unanchored_915	chloroplast	36750	0.340118	0.564653
Unanchored_916	chloroplast	36748	0.401584	0.388892
Unanchored_920	chloroplast	36653	0.388655	0.50869
Unanchored_921	chloroplast	36644	0.425866	0.526607
Unanchored_923	chloroplast	36577	0.404883	0.484321
Unanchored_924	chloroplast	36567	0.345922	0.459294
Unanchored_925	chloroplast	36565	0.445712	0.444059
Unanchored_926	chloroplast	36558	0.399923	0.376279
Unanchored_932	chloroplast	36371	0.242975	0.471392
Unanchored_933	chloroplast	36282	0.343541	0.566286
Unanchored_937	chloroplast	36227	0.363606	0.476247
Unanchored_939	chloroplast	36190	0.257924	0.468334
Unanchored_940	chloroplast	36175	0.424061	0.422612
Unanchored_941	chloroplast	36170	0.377837	0.454189
Unanchored_944	chloroplast	36142	0.367616	0.500055
Unanchored_945	chloroplast	36111	0.461146	0.425992
Unanchored_946	chloroplast	36095	0.159057	0.524394
Unanchored_948	chloroplast	36055	0.476424	0.446873
Unanchored_951	chloroplast	35926	0.19872	0.495101
Unanchored_952	chloroplast	35924	0.474376	0.504732
Unanchored_953	chloroplast	35901	0.335376	0.599621
Unanchored_954	chloroplast	35893	0.392372	0.39328
Unanchored_955	chloroplast	35888	0.321676	0.645675
Unanchored_958	chloroplast	35839	0.413723	0.482742
Unanchored_960	chloroplast	35814	0.346829	0.454794
Unanchored_961	chloroplast	35798	0.383608	0.447455
Unanchored_962	chloroplast	35796	0.3786	0.444687
Unanchored_964	chloroplast	35703	0.482802	0.390079
Unanchored_966	chloroplast	35641	0.457323	0.444208
Unanchored_970	chloroplast	35581	0.458038	0.445069
Unanchored_971	chloroplast	35574	0.373204	0.557514
Unanchored_972	chloroplast	35566	0.470659	0.468762
Unanchored_973	chloroplast	35509	0.362989	0.560506
Unanchored_974	chloroplast	35499	0.33061	0.438266
Unanchored_975	chloroplast	35497	0.45915	0.432656
Unanchored_976	chloroplast	35484	0.445115	0.418386
Unanchored_978	chloroplast	35329	0.358781	0.444649
Unanchored_981	chloroplast	35200	0.373619	0.53233
Unanchored_983	chloroplast	35082	0.4137	0.539336
Unanchored_984	chloroplast	35066	0.335748	0.641676
Unanchored_986	chloroplast	34999	0.354335	0.464128
Unanchored_987	chloroplast	34996	0.341163	0.516373
Unanchored_990	chloroplast	34974	0.439225	0.444444
Unanchored_992	chloroplast	34909	0.360404	0.347074
Unanchored_995	chloroplast	34806	0.501796	0.415331
Unanchored_997	chloroplast	34770	0.392907	0.473857
Unanchored_998	chloroplast	34755	0.367411	0.460883
Unanchored_1001	chloroplast	34706	0.451981	0.40676
Unanchored_1002	chloroplast	34657	0.391765	0.440979
Unanchored_1003	chloroplast	34615	0.437626	0.505821
Unanchored_1007	chloroplast	34568	0.297075	0.661537
Unanchored_1009	chloroplast	34545	0.338872	0.620292
Unanchored_1012	chloroplast	34469	0.324881	0.498941
Unanchored_1016	chloroplast	34439	0.210727	1
Unanchored_1019	chloroplast	34362	0.350368	0.454543
Unanchored_1022	chloroplast	34288	0.439525	0.433388
Unanchored_1023	chloroplast	34270	0.445359	0.496265
Unanchored_1027	chloroplast	34074	0.364658	0.555468
Unanchored_1028	chloroplast	34063	0.404116	0.512726
Unanchored_1029	chloroplast	34035	0.408004	0.442368
Unanchored_1030	chloroplast	34035	0.444379	0.425121
Unanchored_1032	chloroplast	33994	0.517224	0.401453
Unanchored_1034	chloroplast	33971	0.179129	0.495982
Unanchored_1036	chloroplast	33965	0.575551	0.429619
Unanchored_1037	chloroplast	33962	0.274786	0.468524
Unanchored_1040	chloroplast	33921	0.29546	0.49179
Unanchored_1046	chloroplast	33792	0.451452	0.468395
Unanchored_1049	chloroplast	33669	0.494565	0.432356
Unanchored_1051	chloroplast	33630	0.423087	0.485222
Unanchored_1052	chloroplast	33628	0.277694	0.441894
Unanchored_1053	chloroplast	33622	0.432706	0.414223
Unanchored_1056	chloroplast	33604	0.431033	0.557791
Unanchored_1057	chloroplast	33548	0.239366	0.667104
Unanchored_1058	chloroplast	33489	0.276398	0.471229
Unanchored_1059	chloroplast	33482	0.398525	0.518159
Unanchored_1060	chloroplast	33470	0.345215	0.52931
Unanchored_1061	chloroplast	33450	0.193967	0.415964
Unanchored_1062	chloroplast	33444	0.367461	0.552476
Unanchored_1063	chloroplast	33430	0.423614	0.480676
Unanchored_1065	chloroplast	33400	0.487979	0.419102
Unanchored_1067	chloroplast	33393	0.455558	0.476387
Unanchored_1069	chloroplast	33334	0.369094	0.5114
Unanchored_1073	chloroplast	33291	0.358666	0.516836
Unanchored_1075	chloroplast	33278	0.326021	0.428541
Unanchored_1076	chloroplast	33264	0.405015	0.376503
Unanchored_1078	chloroplast	33225	0.414098	0.389195
Unanchored_1079	chloroplast	33223	0.36226	0.520483
Unanchored_1081	chloroplast	33185	0.458414	0.473105
Unanchored_1082	chloroplast	33162	0.285034	0.483053
Unanchored_1084	chloroplast	33156	0.197466	0.488418
Unanchored_1086	chloroplast	33135	0.381602	0.417896
Unanchored_1090	chloroplast	33087	0.371668	0.431136
Unanchored_1092	chloroplast	33069	0.456877	0.471287
Unanchored_1095	chloroplast	32904	0.344254	0.447879
Unanchored_1096	chloroplast	32891	0.3436	0.525007
Unanchored_1097	chloroplast	32886	0.281557	0.512072
Unanchored_1098	chloroplast	32852	0.496119	0.43976
Unanchored_1099	chloroplast	32793	0.361003	0.547586
Unanchored_1100	chloroplast	32755	0.469225	0.468509
Unanchored_1101	chloroplast	32700	0.371357	0.444067
Unanchored_1103	chloroplast	32542	0.504103	0.9823
Unanchored_1107	chloroplast	32402	0.446005	0.502778
Unanchored_1108	chloroplast	32400	0.343159	0.52142
Unanchored_1109	chloroplast	32393	0.474222	0.409564
Unanchored_1110	chloroplast	32384	0.252231	0.460413
Unanchored_1112	chloroplast	32344	0.50388	0.415502
Unanchored_1115	chloroplast	32279	0.500155	0.48434
Unanchored_1117	chloroplast	32265	0.311059	0.553975
Unanchored_1118	chloroplast	32198	0.339473	0.498975
Unanchored_1123	chloroplast	32059	0.105902	0.529648
Unanchored_1131	chloroplast	31910	0.339653	0.522407
Unanchored_1132	chloroplast	31894	0.271345	0.446604
Unanchored_1133	chloroplast	31891	0.342647	0.572795
Unanchored_1136	chloroplast	31806	0.359975	0.524398
Unanchored_1137	chloroplast	31772	0.330931	0.608271
Unanchored_1138	chloroplast	31743	0.338542	0.459975
Unanchored_1139	chloroplast	31739	0.316718	0.50471
Unanchored_1140	chloroplast	31732	0.327156	0.504822
Unanchored_1141	chloroplast	31713	0.420093	0.382178
Unanchored_1143	chloroplast	31635	0.355251	0.440525
Unanchored_1144	chloroplast	31623	0.464613	0.333586
Unanchored_1149	chloroplast	31583	0.358305	0.52161
Unanchored_1151	chloroplast	31522	0.338885	0.450416
Unanchored_1159	chloroplast	31456	0.397393	0.554044
Unanchored_1160	chloroplast	31449	0.31913	0.571529
Unanchored_1163	chloroplast	31378	0.371004	0.647364
Unanchored_1164	chloroplast	31370	0.317766	0.548518
Unanchored_1166	chloroplast	31303	0.346112	0.531706
Unanchored_1167	chloroplast	31193	0.383015	0.508255
Unanchored_1169	chloroplast	31155	0.421294	0.394287
Unanchored_1171	chloroplast	31129	0.520464	0.424588
Unanchored_1173	chloroplast	31098	0.345435	0.517943
Unanchored_1175	chloroplast	31035	0.286524	0.581311
Unanchored_1176	chloroplast	31017	0.494422	0.503917
Unanchored_1178	chloroplast	30990	0.469102	0.443433
Unanchored_1184	chloroplast	30859	0.321894	0.654817
Unanchored_1194	chloroplast	30654	0.434183	0.339825
Unanchored_1195	chloroplast	30596	0.440301	0.485848
Unanchored_1196	chloroplast	30590	0.413319	0.408598
Unanchored_1199	chloroplast	30445	0.314019	0.434029
Unanchored_1200	chloroplast	30441	0.27224	0.519168
Unanchored_1203	chloroplast	30425	0.260124	0.533114
Unanchored_1205	chloroplast	30374	0.349949	0.547903
Unanchored_1208	chloroplast	30242	0.265104	0.4504
Unanchored_1209	chloroplast	30241	0.524802	0.38881
Unanchored_1213	chloroplast	30115	0.325032	0.520903
Unanchored_1219	chloroplast	29950	0.282547	0.572154
Unanchored_1227	chloroplast	29755	0.28013	0.516182
Unanchored_1228	chloroplast	29717	0.168058	0.468587
Unanchored_1229	chloroplast	29706	0.470325	0.540362
Unanchored_1233	chloroplast	29534	0.335252	0.46929
Unanchored_1239	chloroplast	29500	0.410997	0.458542
Unanchored_1248	chloroplast	29390	0.31978	0.488057
Unanchored_1252	chloroplast	29307	0.432198	0.406797
Unanchored_1264	chloroplast	28928	0.387873	0.5513
Unanchored_1269	chloroplast	28844	0.247686	0.62845
Unanchored_1272	chloroplast	28752	0.446698	0.429779
Unanchored_1279	chloroplast	28555	0.380997	0.531501
Unanchored_1287	chloroplast	28440	0.467738	0.522293
Unanchored_1292	chloroplast	28354	0.441893	0.387776
Unanchored_1298	chloroplast	28153	0.390594	0.520513
Unanchored_1300	chloroplast	28132	0.582489	0.385362
Unanchored_1301	chloroplast	28125	0.444389	0.529991
Unanchored_1304	chloroplast	28027	0.287554	0.482642
Unanchored_1306	chloroplast	27979	0.28601	0.501555
Unanchored_1307	chloroplast	27936	0.390048	0.641108
Unanchored_1314	chloroplast	27594	0.412242	0.527651
Unanchored_1321	chloroplast	27350	0.30641	0.490238
Unanchored_1322	chloroplast	27268	0.280999	0.509572
Unanchored_245	mitochondria	66258	0.220143	0.668342
Unanchored_253	mitochondria	64759	0.300056	0.582792
Unanchored_371	mitochondria	53839	0.260262	0.621055
Unanchored_406	mitochondria	51543	0.231617	0.4796
Unanchored_432	mitochondria	50308	0.063669	0.64129
Unanchored_434	mitochondria	50247	0.269832	0.626226
Unanchored_460	mitochondria	49019	0.127504	0.662111
Unanchored_481	mitochondria	48395	0.269786	0.508606
Unanchored_523	mitochondria	46876	0.282005	0.634184
Unanchored_530	mitochondria	46754	0.255877	0.608119
Unanchored_570	mitochondria	45521	0.270738	0.574504
Unanchored_604	mitochondria	44675	0.304271	0.745137
Unanchored_624	mitochondria	44020	0.287717	0.544593
Unanchored_647	mitochondria	43242	0.246155	0.667707
Unanchored_670	mitochondria	42625	0.198972	0.647507
Unanchored_675	mitochondria	42490	0.111911	0.607743
Unanchored_685	mitochondria	42182	0.203788	0.795458
Unanchored_695	mitochondria	41818	0.084989	0.681788
Unanchored_711	mitochondria	41538	0.091894	0.654196
Unanchored_725	mitochondria	41269	0.148178	0.583562
Unanchored_731	mitochondria	41022	0.441871	0.751353
Unanchored_732	mitochondria	41011	0.124409	0.77367
Unanchored_735	mitochondria	40965	0.311566	0.610741
Unanchored_760	mitochondria	40343	0.112984	0.532187
Unanchored_771	mitochondria	40073	0.075514	0.678736
Unanchored_775	mitochondria	39972	0.319407	0.486015
Unanchored_798	mitochondria	39437	0.188381	0.418566
Unanchored_800	mitochondria	39433	0.199863	0.659803
Unanchored_802	mitochondria	39396	0.384643	0.590263
Unanchored_811	mitochondria	39204	0.484912	0.576395
Unanchored_824	mitochondria	39010	0.381707	0.600538
Unanchored_848	mitochondria	38381	0.21902	0.494463
Unanchored_851	mitochondria	38338	0.337898	0.52538
Unanchored_854	mitochondria	38295	0.473468	0.430108
Unanchored_865	mitochondria	38036	0.118522	0.639867
Unanchored_872	mitochondria	37805	0.149402	0.585875
Unanchored_876	mitochondria	37689	0.110008	0.541988
Unanchored_889	mitochondria	37262	0.269263	0.581048
Unanchored_900	mitochondria	37080	0.42725	0.409466
Unanchored_907	mitochondria	36888	0.526229	0.393
Unanchored_912	mitochondria	36807	0.035945	0.715272
Unanchored_913	mitochondria	36765	0.133228	0.658153
Unanchored_917	mitochondria	36746	0.190475	0.715697
Unanchored_922	mitochondria	36594	0.413494	0.442614
Unanchored_928	mitochondria	36502	0.12649	0.581968
Unanchored_930	mitochondria	36386	0.431167	0.412989
Unanchored_934	mitochondria	36254	0.437316	0.535555
Unanchored_942	mitochondria	36158	0.228172	0.561646
Unanchored_957	mitochondria	35846	0.432613	0.477431
Unanchored_1008	mitochondria	34547	0.194755	0.408053
Unanchored_1031	mitochondria	34029	0.109909	0.75468
Unanchored_1038	mitochondria	33962	0.365979	0.569902
Unanchored_1041	mitochondria	33907	0.405533	0.517474
Unanchored_1044	mitochondria	33883	0.360604	0.477201
Unanchored_1047	mitochondria	33719	0.201969	0.781518
Unanchored_1071	mitochondria	33309	0.025489	0.6845
Unanchored_1087	mitochondria	33125	0.037194	0.756528
Unanchored_1091	mitochondria	33076	0.215782	0.521012
Unanchored_1093	mitochondria	33040	0.599413	0.546186
Unanchored_1094	mitochondria	33010	0.064588	0.761315
Unanchored_1106	mitochondria	32411	0.293521	0.594675
Unanchored_1120	mitochondria	32101	0.280312	0.58939
Unanchored_1124	mitochondria	32044	0.272134	0.605262
Unanchored_1142	mitochondria	31685	0.233714	0.464983
Unanchored_1146	mitochondria	31616	0.350024	0.582553
Unanchored_1147	mitochondria	31610	0.442659	0.609902
Unanchored_1158	mitochondria	31473	0.160587	0.671306
Unanchored_1162	mitochondria	31386	0.339525	0.724782
Unanchored_1170	mitochondria	31137	0.241553	0.58673
Unanchored_1179	mitochondria	30983	0.357401	0.584514
Unanchored_1186	mitochondria	30742	0.276927	0.441741
Unanchored_1206	mitochondria	30371	0.490286	0.581146
Unanchored_1210	mitochondria	30227	0.331139	0.556125
Unanchored_1216	mitochondria	30085	0.165404	0.772544
Unanchored_1226	mitochondria	29765	0.12589	0.605779
Unanchored_1242	mitochondria	29452	0.19765	0.773021
Unanchored_1244	mitochondria	29437	0.202099	0.477732
Unanchored_1256	mitochondria	29141	0.47337	0.531107
Unanchored_1260	mitochondria	29030	0.175376	0.736686
Unanchored_1266	mitochondria	28884	0.325347	0.376887
Unanchored_1297	mitochondria	28160	0.392272	0.401634
Unanchored_1302	mitochondria	28120	0.117927	0.756935
Unanchored_1316	mitochondria	27503	0.276307	0.336145
Unanchored_1334	mitochondria	26995	0.319071	0.551658
Unanchored_1343	mitochondria	26620	0.310192	0.423441
Unanchored_1351	mitochondria	26294	0.16571	0.487145
Unanchored_1354	mitochondria	26242	0.541443	0.425196
Unanchored_1355	mitochondria	26241	0.193674	0.55882
Unanchored_1382	mitochondria	24940	0.54938	0.59146
Unanchored_1390	mitochondria	24743	0.242786	0.780382
Unanchored_1401	mitochondria	24424	0.264218	0.680233
Unanchored_1408	mitochondria	24066	0.494951	0.275659
Unanchored_1411	mitochondria	23999	0.47754	0.417726
Unanchored_1451	mitochondria	22106	0.120651	0.844296
Unanchored_1458	mitochondria	21424	0.540354	0.407067
Unanchored_1464	mitochondria	20879	0.292317	0.663969
Unanchored_1468	mitochondria	20642	0.121167	0.605658
Unanchored_1469	mitochondria	20533	0.584161	0.518385
Unanchored_1491	mitochondria	17918	0.170843	0.643543
Unanchored_1493	mitochondria	17508	0.428571	0.404444
Unanchored_1496	mitochondria	17001	0.252059	0.445503
Unanchored_1501	mitochondria	16242	0.150052	0.514592
Unanchored_1	Unanchored	2146005	0.001023	0.999897
Unanchored_2	Unanchored	1881449	0	0.999928
Unanchored_3	Unanchored	1559571	0	0.999973
Unanchored_4	Unanchored	1453049	0.040169	0.999697
Unanchored_5	Unanchored	1234402	0	1
Unanchored_6	Unanchored	1187951	0	0.99995
Unanchored_7	Unanchored	1154995	0	0.999967
Unanchored_8	Unanchored	1098720	0.175125	1
Unanchored_9	Unanchored	951233	0.163968	0.99916
Unanchored_10	Unanchored	949208	0.074601	0.655543
Unanchored_11	Unanchored	879113	0.177253	0.999237
Unanchored_12	Unanchored	850279	0	0.999995
Unanchored_13	Unanchored	768241	0	1
Unanchored_14	Unanchored	728641	0.005612	1
Unanchored_15	Unanchored	719000	0	0.999957
Unanchored_16	Unanchored	647000	0.587091	0.999107
Unanchored_17	Unanchored	619863	0	1
Unanchored_18	Unanchored	559897	0	1
Unanchored_19	Unanchored	525000	0	0.999371
Unanchored_20	Unanchored	510721	0.000775	0.997574
Unanchored_21	Unanchored	455500	0	0.998902
Unanchored_22	Unanchored	452325	0	0.999996
Unanchored_23	Unanchored	444492	0.273657	0.999316
Unanchored_24	Unanchored	436718	0.278299	0.999267
Unanchored_25	Unanchored	435049	0	1
Unanchored_26	Unanchored	407517	0	1
Unanchored_27	Unanchored	399185	0	0.991154
Unanchored_28	Unanchored	372000	0	0.99993
Unanchored_29	Unanchored	370913	0.001715	1
Unanchored_30	Unanchored	317074	0	0.999953
Unanchored_31	Unanchored	305307	0.004235	0.950614
Unanchored_32	Unanchored	302054	0	0.0423004
Unanchored_33	Unanchored	296676	0	0.999956
Unanchored_34	Unanchored	292500	0	0.914957
Unanchored_35	Unanchored	290742	0.004447	0.968481
Unanchored_36	Unanchored	282956	0	1
Unanchored_37	Unanchored	278000	0.259393	0.674245
Unanchored_38	Unanchored	236103	0	1
Unanchored_39	Unanchored	234084	0	0.0581928
Unanchored_40	Unanchored	232274	0	0.999867
Unanchored_41	Unanchored	230786	0	0.988855
Unanchored_42	Unanchored	230000	0	1
Unanchored_43	Unanchored	224620	0	0.984952
Unanchored_44	Unanchored	206903	0	0.988478
Unanchored_45	Unanchored	205841	0.269821	0.653602
Unanchored_46	Unanchored	203238	0	0.941581
Unanchored_47	Unanchored	200147	0	0.816985
Unanchored_48	Unanchored	199797	0.966806	0.029585
Unanchored_49	Unanchored	197847	0	0.999975
Unanchored_50	Unanchored	181759	0	0.999978
Unanchored_51	Unanchored	179564	0	1
Unanchored_52	Unanchored	178734	0	0.925235
Unanchored_53	Unanchored	176951	0.214501	0.743816
Unanchored_54	Unanchored	176741	0.812793	0
Unanchored_55	Unanchored	176017	0	0.999972
Unanchored_56	Unanchored	170804	0.052165	0.999772
Unanchored_57	Unanchored	167002	0.000575	1
Unanchored_58	Unanchored	162477	0.870935	0.915163
Unanchored_59	Unanchored	157811	0.834637	0.9228
Unanchored_60	Unanchored	156004	0	1
Unanchored_61	Unanchored	153919	0.917878	0.914741
Unanchored_62	Unanchored	150568	0	0.985037
Unanchored_63	Unanchored	150162	0	0.996937
Unanchored_64	Unanchored	150083	0	0.910943
Unanchored_65	Unanchored	150011	0.943997	0.913746
Unanchored_66	Unanchored	149381	0.894002	0.912907
Unanchored_67	Unanchored	141843	0.00827	0.967831
Unanchored_68	Unanchored	140728	0	0.929623
Unanchored_69	Unanchored	138141	0	0.991632
Unanchored_71	Unanchored	136259	0.843481	0.914949
Unanchored_72	Unanchored	134157	0	0.977288
Unanchored_73	Unanchored	131320	0	0.907958
Unanchored_74	Unanchored	128712	0.872699	0.914787
Unanchored_76	Unanchored	126045	0	0.997334
Unanchored_77	Unanchored	124738	0	1
Unanchored_78	Unanchored	123267	0.929234	0.913627
Unanchored_79	Unanchored	123233	0.052316	0.997314
Unanchored_80	Unanchored	123000	0	0.999146
Unanchored_81	Unanchored	119342	0	1
Unanchored_82	Unanchored	115774	0	0.989428
Unanchored_83	Unanchored	115266	0	0.924236
Unanchored_84	Unanchored	112858	0.003535	0.999965
Unanchored_85	Unanchored	112211	0	0.985394
Unanchored_86	Unanchored	111920	0.05294	0.999857
Unanchored_87	Unanchored	111092	0	1
Unanchored_89	Unanchored	109442	0	1
Unanchored_91	Unanchored	107359	0	1
Unanchored_92	Unanchored	107175	0.906591	0.914626
Unanchored_94	Unanchored	103783	0	0.993987
Unanchored_96	Unanchored	103407	0	0.989188
Unanchored_97	Unanchored	102765	0.945487	0.913336
Unanchored_98	Unanchored	102417	0.948826	0.913364
Unanchored_100	Unanchored	101916	0	0.989717
Unanchored_101	Unanchored	101359	0	1
Unanchored_102	Unanchored	101150	0.012783	0.822145
Unanchored_103	Unanchored	99910	0.85692	0.913612
Unanchored_104	Unanchored	99851	0	0.988783
Unanchored_105	Unanchored	97878	0.038242	0.955884
Unanchored_108	Unanchored	96473	0	0.996911
Unanchored_109	Unanchored	96280	0	0.99571
Unanchored_110	Unanchored	95765	0.519882	0.999269
Unanchored_111	Unanchored	95749	0	0.999394
Unanchored_112	Unanchored	95544	0.756183	0.915065
Unanchored_116	Unanchored	93000	0	0.999108
Unanchored_117	Unanchored	92274	0	0.990062
Unanchored_118	Unanchored	91505	0	1
Unanchored_124	Unanchored	88285	0	1
Unanchored_126	Unanchored	87868	0	0.990156
Unanchored_128	Unanchored	86327	0	0.988787
Unanchored_130	Unanchored	85965	0	1
Unanchored_131	Unanchored	85917	0	0.904082
Unanchored_142	Unanchored	84011	0.022247	0.968337
Unanchored_145	Unanchored	83946	0	0.989017
Unanchored_148	Unanchored	83428	0	0.938917
Unanchored_149	Unanchored	83398	0	0.996307
Unanchored_155	Unanchored	81711	0.866491	0.91585
Unanchored_157	Unanchored	81000	0.929172	0.999111
Unanchored_158	Unanchored	80632	0	0.903525
Unanchored_164	Unanchored	78631	0.89958	0.912897
Unanchored_165	Unanchored	78599	0.896804	0.917085
Unanchored_166	Unanchored	78101	0.906607	0.912639
Unanchored_167	Unanchored	77992	0.906181	0.91553
Unanchored_174	Unanchored	77123	0.815345	0.911129
Unanchored_175	Unanchored	76699	0	1
Unanchored_179	Unanchored	76237	0.940501	0.910149
Unanchored_180	Unanchored	76076	0.558791	0.999277
Unanchored_181	Unanchored	75990	0.815829	0.91487
Unanchored_182	Unanchored	75964	0.927807	0.911537
Unanchored_183	Unanchored	75940	0.935185	0.909797
Unanchored_194	Unanchored	74321	0	1
Unanchored_197	Unanchored	73428	0	0.992278
Unanchored_198	Unanchored	73389	0.729206	0.915887
Unanchored_199	Unanchored	73137	0.967116	0.913327
Unanchored_200	Unanchored	73061	0.983219	0.911252
Unanchored_201	Unanchored	72998	0.121128	0.956889
Unanchored_204	Unanchored	71764	0.863899	0.911557
Unanchored_205	Unanchored	71698	0.87323	0.915088
Unanchored_211	Unanchored	70788	0.875825	0.913686
Unanchored_215	Unanchored	69942	0.886419	0.913628
Unanchored_216	Unanchored	69891	0.889355	0.91657
Unanchored_217	Unanchored	69825	0.886901	0.912796
Unanchored_220	Unanchored	69274	0.891747	0.910977
Unanchored_223	Unanchored	68174	0	0.00418048
Unanchored_226	Unanchored	67804	0	0.999277
Unanchored_236	Unanchored	67220	0.92459	0.91327
Unanchored_238	Unanchored	67000	0.083509	0.914701
Unanchored_239	Unanchored	66918	0.66699	0.918856
Unanchored_240	Unanchored	66869	0	0.988051
Unanchored_243	Unanchored	66325	0.759514	0.915748
Unanchored_248	Unanchored	65931	0	0.991248
Unanchored_254	Unanchored	64605	0	0.999907
Unanchored_257	Unanchored	64528	0.955755	0.911139
Unanchored_260	Unanchored	64235	0.828222	0.916572
Unanchored_261	Unanchored	63945	0.963061	0.911893
Unanchored_265	Unanchored	63249	0.839125	0.915999
Unanchored_278	Unanchored	61449	0.721016	0.917346
Unanchored_285	Unanchored	60887	0.873534	0.916764
Unanchored_291	Unanchored	60430	0.364378	0.202697
Unanchored_293	Unanchored	60297	0.877969	0.9159
Unanchored_294	Unanchored	60253	0	0.995403
Unanchored_295	Unanchored	60218	0.735822	0.915009
Unanchored_297	Unanchored	60028	0.084895	0.82948
Unanchored_300	Unanchored	59920	0.054073	0.99985
Unanchored_303	Unanchored	59364	0.995553	0
Unanchored_304	Unanchored	59360	0.746391	0.917958
Unanchored_307	Unanchored	59076	0	0.996513
Unanchored_309	Unanchored	58913	0.752037	0.915723
Unanchored_311	Unanchored	58758	0.007761	0.925729
Unanchored_312	Unanchored	58727	0.754521	0.917449
Unanchored_315	Unanchored	58334	0.922908	0.913121
Unanchored_316	Unanchored	58320	0.910784	0.913083
Unanchored_319	Unanchored	58095	0.854684	0.916946
Unanchored_320	Unanchored	57998	0	0.989724
Unanchored_324	Unanchored	57400	0.926602	0.91169
Unanchored_332	Unanchored	56654	0.937567	0.910509
Unanchored_333	Unanchored	56598	0	0.342132
Unanchored_337	Unanchored	56136	0.958422	0.909719
Unanchored_343	Unanchored	55742	0	0.987801
Unanchored_345	Unanchored	55526	0	1
Unanchored_356	Unanchored	54897	0.801151	0.916881
Unanchored_357	Unanchored	54626	0	1
Unanchored_362	Unanchored	54196	0.238933	0.62953
Unanchored_366	Unanchored	54096	0	0.997283
Unanchored_367	Unanchored	54065	0.820823	0.915528
Unanchored_369	Unanchored	54000	0	0.887426
Unanchored_374	Unanchored	53609	0	0.987801
Unanchored_375	Unanchored	53568	0	0.921614
Unanchored_381	Unanchored	53086	0.834661	0.912218
Unanchored_383	Unanchored	52901	0.855388	0.913688
Unanchored_386	Unanchored	52767	0.053728	0.987113
Unanchored_389	Unanchored	52562	0.064439	0.999962
Unanchored_392	Unanchored	52431	0.84322	0.912838
Unanchored_394	Unanchored	52174	0.589136	0.356327
Unanchored_400	Unanchored	51794	0.855463	0.916728
Unanchored_402	Unanchored	51724	0.85666	0.916731
Unanchored_409	Unanchored	51402	0	0.996829
Unanchored_410	Unanchored	51397	0.862071	0.916201
Unanchored_419	Unanchored	50992	0	1
Unanchored_420	Unanchored	50990	0	1
Unanchored_424	Unanchored	50861	0	0.990307
Unanchored_430	Unanchored	50344	0	0.989055
Unanchored_431	Unanchored	50325	0.238634	0.55696
Unanchored_435	Unanchored	50225	0.349196	0.542558
Unanchored_437	Unanchored	50000	0	1
Unanchored_438	Unanchored	49985	0.886324	0.917715
Unanchored_439	Unanchored	49963	0.892438	0.908612
Unanchored_444	Unanchored	49776	0	0.989272
Unanchored_449	Unanchored	49599	0.317654	0.544043
Unanchored_450	Unanchored	49525	0.891588	0.906552
Unanchored_451	Unanchored	49480	0.909254	0.908185
Unanchored_457	Unanchored	49279	0	0.989042
Unanchored_467	Unanchored	48868	0	0.906258
Unanchored_468	Unanchored	48857	0.322478	0.541355
Unanchored_469	Unanchored	48833	0	0.979543
Unanchored_471	Unanchored	48690	0.911479	0.91643
Unanchored_475	Unanchored	48510	0.908038	0.90905
Unanchored_485	Unanchored	48223	0.324396	0.552288
Unanchored_486	Unanchored	48189	0	0.999958
Unanchored_491	Unanchored	47922	0.241731	0.535307
Unanchored_497	Unanchored	47775	0.744526	0.913511
Unanchored_503	Unanchored	47380	0.366217	0.547847
Unanchored_512	Unanchored	47160	0	0
Unanchored_521	Unanchored	46910	0.758255	0.913366
Unanchored_522	Unanchored	46889	0	0.988249
Unanchored_524	Unanchored	46866	0.007511	1
Unanchored_526	Unanchored	46839	0.386865	0.531373
Unanchored_527	Unanchored	46836	0.172392	0.904817
Unanchored_534	Unanchored	46656	0.760797	0.916217
Unanchored_536	Unanchored	46579	0.332754	0.538526
Unanchored_538	Unanchored	46553	0	0
Unanchored_546	Unanchored	46269	0	0.916164
Unanchored_550	Unanchored	46216	0.960338	0.915419
Unanchored_560	Unanchored	45799	0.776584	0.911243
Unanchored_563	Unanchored	45670	0.384747	0.554018
Unanchored_564	Unanchored	45628	0.771166	0.917134
Unanchored_567	Unanchored	45534	0.907386	0.543616
Unanchored_569	Unanchored	45521	0.779899	0.916083
Unanchored_571	Unanchored	45516	0.779853	0.916403
Unanchored_573	Unanchored	45476	0.782188	0.916308
Unanchored_575	Unanchored	45460	0.249192	0.51707
Unanchored_577	Unanchored	45438	0.59621	0.916282
Unanchored_578	Unanchored	45431	0.275765	0.550219
Unanchored_582	Unanchored	45248	0.335558	0.523603
Unanchored_583	Unanchored	45208	0.7851	0.910414
Unanchored_593	Unanchored	44914	0	0.993387
Unanchored_595	Unanchored	44888	0.276784	0.556897
Unanchored_598	Unanchored	44821	0.279473	0.557551
Unanchored_599	Unanchored	44776	0.79435	0.915021
Unanchored_600	Unanchored	44759	0.304415	0.55285
Unanchored_608	Unanchored	44544	0	0.995286
Unanchored_611	Unanchored	44480	0.803233	0.914096
Unanchored_612	Unanchored	44472	0	0.918555
Unanchored_616	Unanchored	44260	0.923292	0.914031
Unanchored_620	Unanchored	44139	0.74215	0.913795
Unanchored_628	Unanchored	43909	0.810035	0.913344
Unanchored_632	Unanchored	43718	0.812133	0.912919
Unanchored_634	Unanchored	43526	0	0.996531
Unanchored_644	Unanchored	43295	0	0.999885
Unanchored_645	Unanchored	43285	0	0.990343
Unanchored_646	Unanchored	43258	0.695055	0.911785
Unanchored_648	Unanchored	43182	0.255251	0.566254
Unanchored_650	Unanchored	43135	0.618746	0.92236
Unanchored_651	Unanchored	43074	0.365774	0.511515
Unanchored_658	Unanchored	42916	0.409484	0.540428
Unanchored_662	Unanchored	42823	0.953692	0.911146
Unanchored_664	Unanchored	42741	0	0.994198
Unanchored_665	Unanchored	42696	0	0.992552
Unanchored_666	Unanchored	42686	0.625184	0.920208
Unanchored_668	Unanchored	42664	0.339779	0.51261
Unanchored_672	Unanchored	42594	0.127321	0.988261
Unanchored_678	Unanchored	42409	0.630942	0.922116
Unanchored_684	Unanchored	42184	0.373492	0.496255
Unanchored_690	Unanchored	41963	0.375483	0.503658
Unanchored_696	Unanchored	41805	0.85078	0.915178
Unanchored_698	Unanchored	41796	0	1
Unanchored_699	Unanchored	41783	0	0.999856
Unanchored_700	Unanchored	41756	0	0.996432
Unanchored_705	Unanchored	41669	0.274527	0.533058
Unanchored_707	Unanchored	41606	0.641437	0.920564
Unanchored_712	Unanchored	41535	0.275437	0.521969
Unanchored_715	Unanchored	41516	0.642804	0.92044
Unanchored_717	Unanchored	41458	0	0.989314
Unanchored_718	Unanchored	41371	0.247788	0.545817
Unanchored_719	Unanchored	41346	0.858532	0.914236
Unanchored_724	Unanchored	41279	0.328577	0.465031
Unanchored_727	Unanchored	41178	0	0.91884
Unanchored_728	Unanchored	41116	0.865037	0.913756
Unanchored_730	Unanchored	41054	0	0.995031
Unanchored_734	Unanchored	40985	0.236141	0.587337
Unanchored_738	Unanchored	40919	0.387091	0.506049
Unanchored_740	Unanchored	40906	0.175138	0.509363
Unanchored_741	Unanchored	40859	0	0.983822
Unanchored_742	Unanchored	40841	0.870935	0.91937
Unanchored_744	Unanchored	40782	0.654373	0.919008
Unanchored_747	Unanchored	40703	0	0.994005
Unanchored_748	Unanchored	40703	0.879048	0.906493
Unanchored_749	Unanchored	40697	0.425349	0.508883
Unanchored_750	Unanchored	40679	0.418236	0.445832
Unanchored_754	Unanchored	40447	0.389556	0.50696
Unanchored_755	Unanchored	40430	0	0.944348
Unanchored_765	Unanchored	40151	0.886849	0.91659
Unanchored_768	Unanchored	40104	0.459093	0.510548
Unanchored_769	Unanchored	40100	0	1
Unanchored_770	Unanchored	40099	0.362637	0.496371
Unanchored_773	Unanchored	40019	0.666875	0.910268
Unanchored_777	Unanchored	39919	0.426625	0.532478
Unanchored_778	Unanchored	39837	0.891053	0.916434
Unanchored_781	Unanchored	39780	0.9095	0.91086
Unanchored_783	Unanchored	39753	0.892987	0.917163
Unanchored_784	Unanchored	39750	0.671363	0.910491
Unanchored_786	Unanchored	39712	0.243711	0.577004
Unanchored_788	Unanchored	39656	0.41455	0.441497
Unanchored_790	Unanchored	39600	0.896336	0.910455
Unanchored_795	Unanchored	39490	0.245081	0.572246
Unanchored_801	Unanchored	39410	0.245578	0.576808
Unanchored_804	Unanchored	39330	0.684355	0.915866
Unanchored_806	Unanchored	39305	0.263408	0.554993
Unanchored_807	Unanchored	39295	0	0.999796
Unanchored_808	Unanchored	39282	0.905272	0.919862
Unanchored_813	Unanchored	39195	0.680895	0.922337
Unanchored_816	Unanchored	39099	0.292573	0.516305
Unanchored_819	Unanchored	39069	0.199217	0.501165
Unanchored_820	Unanchored	39065	0.613071	0.915449
Unanchored_825	Unanchored	38995	0.686259	0.915246
Unanchored_828	Unanchored	38925	0	0.987463
Unanchored_833	Unanchored	38763	0.320984	0.495885
Unanchored_834	Unanchored	38729	0.022826	0.98616
Unanchored_838	Unanchored	38661	0.175737	0.47363
Unanchored_843	Unanchored	38502	0.693151	0.914212
Unanchored_845	Unanchored	38413	0	0.996407
Unanchored_847	Unanchored	38381	0.408546	0.59803
Unanchored_849	Unanchored	38377	0.298077	0.521093
Unanchored_850	Unanchored	38362	0.697479	0.920651
Unanchored_852	Unanchored	38327	0.940823	0.90748
Unanchored_855	Unanchored	38286	0.203474	0.616936
Unanchored_858	Unanchored	38239	0.275956	0.54685
Unanchored_861	Unanchored	38179	0.408272	0.49928
Unanchored_862	Unanchored	38179	0.700849	0.913486
Unanchored_863	Unanchored	38080	0.363481	0.496035
Unanchored_884	Unanchored	37397	0.713579	0.919486
Unanchored_885	Unanchored	37390	0.362647	0.464643
Unanchored_886	Unanchored	37312	0.146579	0.564269
Unanchored_890	Unanchored	37262	0.032366	0.999973
Unanchored_891	Unanchored	37260	0	0.989533
Unanchored_892	Unanchored	37230	0.359209	0.46715
Unanchored_897	Unanchored	37121	0.714143	0.925783
Unanchored_899	Unanchored	37109	0	0.990919
Unanchored_902	Unanchored	37054	0.048822	0.997787
Unanchored_905	Unanchored	36910	0.725026	0.925413
Unanchored_906	Unanchored	36899	0	0.900594
Unanchored_908	Unanchored	36880	0.245614	0.56692
Unanchored_909	Unanchored	36868	0.161527	0.544971
Unanchored_914	Unanchored	36755	0.726125	0.925126
Unanchored_918	Unanchored	36734	0.728473	0.925001
Unanchored_919	Unanchored	36696	0.722387	0.923725
Unanchored_927	Unanchored	36537	0	0.989764
Unanchored_929	Unanchored	36442	0.348948	0.478075
Unanchored_931	Unanchored	36378	0.735657	0.924267
Unanchored_935	Unanchored	36246	0	0.999697
Unanchored_936	Unanchored	36235	0.736463	0.924024
Unanchored_938	Unanchored	36221	0.434981	0.476906
Unanchored_943	Unanchored	36147	0.738367	0.923839
Unanchored_947	Unanchored	36060	0.741008	0.922185
Unanchored_949	Unanchored	35967	0.335039	0.439431
Unanchored_950	Unanchored	35928	0	0.996966
Unanchored_956	Unanchored	35853	0.269943	0.552367
Unanchored_959	Unanchored	35821	0.257984	0.55219
Unanchored_963	Unanchored	35734	0	0.989562
Unanchored_965	Unanchored	35680	0.747947	0.921637
Unanchored_967	Unanchored	35625	0.768358	0.922723
Unanchored_968	Unanchored	35601	0.428961	0.408865
Unanchored_969	Unanchored	35587	0.750014	0.92264
Unanchored_977	Unanchored	35440	0.427664	0.415124
Unanchored_979	Unanchored	35304	0	1
Unanchored_980	Unanchored	35291	0.274242	0.552549
Unanchored_982	Unanchored	35180	0	1
Unanchored_985	Unanchored	35000	0.251664	0.552771
Unanchored_988	Unanchored	34994	0.299517	0.627479
Unanchored_989	Unanchored	34990	0	0.999
Unanchored_991	Unanchored	34965	0	0.891234
Unanchored_993	Unanchored	34902	0.132174	0.985703
Unanchored_994	Unanchored	34848	0.324447	0.471419
Unanchored_996	Unanchored	34783	0.767207	0.920881
Unanchored_999	Unanchored	34746	0.376083	0.477005
Unanchored_1000	Unanchored	34724	0.482764	0.507171
Unanchored_1004	Unanchored	34592	0.336301	0.463084
Unanchored_1005	Unanchored	34588	0.282158	0.479762
Unanchored_1006	Unanchored	34572	0	0.97336
Unanchored_1010	Unanchored	34505	0	0.997797
Unanchored_1011	Unanchored	34478	0.773965	0.92021
Unanchored_1013	Unanchored	34457	0.774466	0.920132
Unanchored_1014	Unanchored	34447	0.304302	0.657793
Unanchored_1015	Unanchored	34443	0.774897	0.920187
Unanchored_1017	Unanchored	34439	0	0.477801
Unanchored_1018	Unanchored	34423	0.775289	0.927548
Unanchored_1020	Unanchored	34333	0.006728	0.999913
Unanchored_1021	Unanchored	34317	0.777655	0.919836
Unanchored_1024	Unanchored	34215	0	0.888791
Unanchored_1025	Unanchored	34155	0.701177	0.919426
Unanchored_1026	Unanchored	34133	0.299367	0.507573
Unanchored_1033	Unanchored	33994	0.01465	0.923722
Unanchored_1035	Unanchored	33966	0.787811	0.918948
Unanchored_1039	Unanchored	33955	0	0.985834
Unanchored_1042	Unanchored	33904	0.722827	0.91883
Unanchored_1043	Unanchored	33901	0.529469	0.931447
Unanchored_1045	Unanchored	33874	0.337703	0.507056
Unanchored_1048	Unanchored	33679	0.287369	0.540159
Unanchored_1050	Unanchored	33668	0	1
Unanchored_1054	Unanchored	33617	0.79599	0.925841
Unanchored_1055	Unanchored	33613	0.793943	0.917681
Unanchored_1064	Unanchored	33402	0.33005	0.473056
Unanchored_1066	Unanchored	33395	0.331317	0.494056
Unanchored_1068	Unanchored	33336	0.536283	0.930286
Unanchored_1070	Unanchored	33315	0.538752	0.930212
Unanchored_1072	Unanchored	33305	0	0.989341
Unanchored_1074	Unanchored	33281	0.457091	0.47787
Unanchored_1077	Unanchored	33249	0.277942	0.538964
Unanchored_1080	Unanchored	33192	0.474496	0.356441
Unanchored_1083	Unanchored	33160	0.315812	0.489475
Unanchored_1085	Unanchored	33150	0.423452	0.515988
Unanchored_1088	Unanchored	33122	0	0.993539
Unanchored_1089	Unanchored	33091	0.180326	0.525188
Unanchored_1102	Unanchored	32590	0.295406	0.524885
Unanchored_1104	Unanchored	32542	0.02775	0.434884
Unanchored_1105	Unanchored	32482	0	0.988578
Unanchored_1111	Unanchored	32371	0.298981	0.53792
Unanchored_1113	Unanchored	32322	0.324278	0.571004
Unanchored_1114	Unanchored	32291	0.26485	0.573751
Unanchored_1116	Unanchored	32270	0.28436	0.483607
Unanchored_1119	Unanchored	32180	0.002424	0.999969
Unanchored_1121	Unanchored	32082	0.326704	0.58843
Unanchored_1122	Unanchored	32081	0.435349	0.473738
Unanchored_1125	Unanchored	32031	0.176772	0.380725
Unanchored_1126	Unanchored	32015	0.558412	0.927409
Unanchored_1127	Unanchored	32002	0.834005	0.92213
Unanchored_1128	Unanchored	31946	0.458726	0.353753
Unanchored_1129	Unanchored	31926	0.562193	0.918687
Unanchored_1130	Unanchored	31910	0.310257	0.49204
Unanchored_1134	Unanchored	31841	0.513976	0.409252
Unanchored_1135	Unanchored	31833	0.401074	0.609493
Unanchored_1145	Unanchored	31616	0.455701	0.483711
Unanchored_1148	Unanchored	31609	0.556631	0.919548
Unanchored_1150	Unanchored	31528	0.848765	0.920959
Unanchored_1152	Unanchored	31509	0.30716	0.522835
Unanchored_1153	Unanchored	31489	0.321456	0.591508
Unanchored_1154	Unanchored	31488	0.500143	0.32298
Unanchored_1155	Unanchored	31484	0.524886	0.403602
Unanchored_1156	Unanchored	31482	0	0.984054
Unanchored_1157	Unanchored	31481	0.580686	0.920841
Unanchored_1161	Unanchored	31396	0	0.905083
Unanchored_1165	Unanchored	31358	0.851038	0.920499
Unanchored_1168	Unanchored	31157	0.84828	0.912636
Unanchored_1172	Unanchored	31116	0.595822	0.922805
Unanchored_1174	Unanchored	31052	0.375866	0.520353
Unanchored_1177	Unanchored	31015	0.262914	0.526294
Unanchored_1180	Unanchored	30976	0.200613	0.545584
Unanchored_1181	Unanchored	30975	0.286014	0.510993
Unanchored_1182	Unanchored	30967	0.323387	0.557949
Unanchored_1183	Unanchored	30880	0.299589	0.514022
Unanchored_1185	Unanchored	30809	0	1
Unanchored_1187	Unanchored	30727	0.492417	0.326586
Unanchored_1188	Unanchored	30725	0.490691	0.32664
Unanchored_1189	Unanchored	30705	0.878355	0.918841
Unanchored_1190	Unanchored	30700	0.582429	0.92886
Unanchored_1191	Unanchored	30696	0.329109	0.464588
Unanchored_1192	Unanchored	30682	0.314722	0.476599
Unanchored_1193	Unanchored	30660	0.58544	0.924201
Unanchored_1197	Unanchored	30501	0	0.892823
Unanchored_1198	Unanchored	30479	0.218354	0.444536
Unanchored_1201	Unanchored	30438	0.075632	0.99977
Unanchored_1202	Unanchored	30435	0.359204	0.57815
Unanchored_1204	Unanchored	30413	0.350815	0.633874
Unanchored_1207	Unanchored	30325	0.59194	0.922902
Unanchored_1211	Unanchored	30187	0.531703	0.392189
Unanchored_1212	Unanchored	30156	0.238368	0.530707
Unanchored_1214	Unanchored	30113	0.886258	0.919437
Unanchored_1215	Unanchored	30106	0.521076	0.413705
Unanchored_1217	Unanchored	30032	0.595351	0.922649
Unanchored_1218	Unanchored	30008	0.269137	0.522027
Unanchored_1220	Unanchored	29876	0.225406	0.528652
Unanchored_1221	Unanchored	29875	0	0.996586
Unanchored_1222	Unanchored	29855	0.598915	0.920616
Unanchored_1223	Unanchored	29809	0.920223	0.916401
Unanchored_1224	Unanchored	29786	0.605909	0.921675
Unanchored_1225	Unanchored	29770	0.341631	0.526973
Unanchored_1230	Unanchored	29691	0.78198	0.921559
Unanchored_1231	Unanchored	29681	0.340566	0.463394
Unanchored_1232	Unanchored	29564	0.327639	0.457347
Unanchored_1234	Unanchored	29526	0.605453	0.916955
Unanchored_1235	Unanchored	29518	0.973405	0.915577
Unanchored_1236	Unanchored	29509	0.276332	0.520621
Unanchored_1237	Unanchored	29508	0.605856	0.921276
Unanchored_1238	Unanchored	29501	0.276407	0.515067
Unanchored_1240	Unanchored	29481	0.893623	0.91598
Unanchored_1241	Unanchored	29479	0.301174	0.555989
Unanchored_1243	Unanchored	29445	0.607153	0.929869
Unanchored_1245	Unanchored	29423	0.607641	0.929205
Unanchored_1246	Unanchored	29415	0.474944	0.527316
Unanchored_1247	Unanchored	29411	0.46678	0.31835
Unanchored_1249	Unanchored	29373	0.908586	0.91979
Unanchored_1250	Unanchored	29364	0.608793	0.919561
Unanchored_1251	Unanchored	29354	0.32736	0.563467
Unanchored_1253	Unanchored	29274	0	0.987053
Unanchored_1254	Unanchored	29240	0.94456	0.914774
Unanchored_1255	Unanchored	29200	0.346039	0.47363
Unanchored_1257	Unanchored	29129	0.612709	0.929143
Unanchored_1258	Unanchored	29109	0.304315	0.65667
Unanchored_1259	Unanchored	29052	0.323294	0.43491
Unanchored_1261	Unanchored	29013	0.618606	0.919932
Unanchored_1262	Unanchored	29004	0.25287	0.619501
Unanchored_1263	Unanchored	28996	0.049043	0.99931
Unanchored_1265	Unanchored	28887	0.96552	0.913698
Unanchored_1267	Unanchored	28869	0.308092	0.599744
Unanchored_1268	Unanchored	28860	0.62192	0.924012
Unanchored_1270	Unanchored	28836	0.427779	0.521709
Unanchored_1271	Unanchored	28755	0.464005	0.321892
Unanchored_1273	Unanchored	28713	0.304437	0.500366
Unanchored_1274	Unanchored	28705	0.622805	0.917471
Unanchored_1275	Unanchored	28679	0.347374	0.483629
Unanchored_1276	Unanchored	28659	0.210064	0.496319
Unanchored_1277	Unanchored	28611	0.621146	0.927825
Unanchored_1278	Unanchored	28598	0.27947	0.498671
Unanchored_1280	Unanchored	28546	0.339989	0.62944
Unanchored_1281	Unanchored	28485	0.312245	0.584343
Unanchored_1282	Unanchored	28482	0.312313	0.600485
Unanchored_1283	Unanchored	28476	0.525162	0.399705
Unanchored_1284	Unanchored	28473	0.216107	0.547923
Unanchored_1285	Unanchored	28469	0.627968	0.918051
Unanchored_1286	Unanchored	28458	0.013599	0.952175
Unanchored_1288	Unanchored	28433	0	0.989484
Unanchored_1289	Unanchored	28422	0.514303	0.426888
Unanchored_1290	Unanchored	28387	0.378426	0.530102
Unanchored_1291	Unanchored	28366	0.632752	0.927202
Unanchored_1293	Unanchored	28330	0.356631	0.481115
Unanchored_1294	Unanchored	28264	0.380391	0.433803
Unanchored_1295	Unanchored	28212	0.238701	0.561711
Unanchored_1296	Unanchored	28170	0.4047	0.345651
Unanchored_1299	Unanchored	28134	0.348701	0.540165
Unanchored_1303	Unanchored	28120	0.242932	0.485597
Unanchored_1305	Unanchored	27995	0.26695	0.518414
Unanchored_1308	Unanchored	27900	0.420839	0.304265
Unanchored_1309	Unanchored	27881	0.325143	0.647466
Unanchored_1310	Unanchored	27829	0	0.990765
Unanchored_1311	Unanchored	27732	0.644549	0.925573
Unanchored_1312	Unanchored	27649	0.33308	0.647944
Unanchored_1313	Unanchored	27613	0.401963	0.614566
Unanchored_1315	Unanchored	27510	0.482279	0.307997
Unanchored_1317	Unanchored	27483	0	0.999381
Unanchored_1318	Unanchored	27456	0.653724	0.924643
Unanchored_1319	Unanchored	27404	0	0.988542
Unanchored_1320	Unanchored	27387	0.677719	0.92449
Unanchored_1323	Unanchored	27259	0.563578	0.374922
Unanchored_1324	Unanchored	27242	0	0.919426
Unanchored_1325	Unanchored	27239	0	0.996476
Unanchored_1326	Unanchored	27207	0	0.999485
Unanchored_1327	Unanchored	27185	0.370328	0.48821
Unanchored_1328	Unanchored	27131	0.326318	0.518706
Unanchored_1329	Unanchored	27121	0.548857	0.431363
Unanchored_1330	Unanchored	27092	0.361596	0.475048
Unanchored_1331	Unanchored	27052	0.391668	0.463108
Unanchored_1332	Unanchored	27000	0	1
Unanchored_1333	Unanchored	26999	0.42055	0.428868
Unanchored_1335	Unanchored	26951	0.538367	0.439872
Unanchored_1336	Unanchored	26933	0.515224	0.442246
Unanchored_1337	Unanchored	26850	0	0.98946
Unanchored_1338	Unanchored	26807	0.219988	0.532137
Unanchored_1339	Unanchored	26753	0.467143	0.618809
Unanchored_1340	Unanchored	26744	0.988184	0.922375
Unanchored_1341	Unanchored	26715	0.344613	0.473554
Unanchored_1342	Unanchored	26703	0.385926	0.447403
Unanchored_1344	Unanchored	26592	0.365537	0.532905
Unanchored_1345	Unanchored	26522	0.461069	0.538308
Unanchored_1346	Unanchored	26505	0.409033	0.416186
Unanchored_1347	Unanchored	26497	0.423649	0.589991
Unanchored_1348	Unanchored	26439	0.420607	0.490336
Unanchored_1349	Unanchored	26380	0.346374	0.535102
Unanchored_1350	Unanchored	26361	0.729894	0.921703
Unanchored_1352	Unanchored	26260	0.66819	0.920183
Unanchored_1353	Unanchored	26259	0.680859	0.924102
Unanchored_1356	Unanchored	26229	0.885923	0.921308
Unanchored_1357	Unanchored	26140	0	1
Unanchored_1358	Unanchored	26064	0.046618	0.998696
Unanchored_1359	Unanchored	25911	0.700888	0.920266
Unanchored_1360	Unanchored	25786	0.69331	0.919957
Unanchored_1361	Unanchored	25769	0.376397	0.481742
Unanchored_1362	Unanchored	25697	0.313667	0.483636
Unanchored_1363	Unanchored	25678	0	1
Unanchored_1364	Unanchored	25658	0.244378	0.668836
Unanchored_1365	Unanchored	25650	0.364654	0.672086
Unanchored_1366	Unanchored	25622	0.697787	0.919015
Unanchored_1367	Unanchored	25604	0.198453	0.513045
Unanchored_1368	Unanchored	25515	0.32735	0.607329
Unanchored_1369	Unanchored	25510	0.46756	0.349314
Unanchored_1370	Unanchored	25485	0	0.975986
Unanchored_1371	Unanchored	25435	0.705709	0.918813
Unanchored_1372	Unanchored	25351	0.171479	0.554495
Unanchored_1373	Unanchored	25255	0.33072	0.531103
Unanchored_1374	Unanchored	25140	0.368869	0.323747
Unanchored_1375	Unanchored	25133	0	0.460669
Unanchored_1376	Unanchored	25020	0.362405	0.929616
Unanchored_1377	Unanchored	25000	0.823273	0.95204
Unanchored_1378	Unanchored	25000	0	0.41204
Unanchored_1379	Unanchored	25000	0	0.92552
Unanchored_1380	Unanchored	25000	0	1
Unanchored_1381	Unanchored	25000	0.308052	0.99992
Unanchored_1383	Unanchored	24924	0.340529	0.459356
Unanchored_1384	Unanchored	24879	0.419728	0.327184
Unanchored_1385	Unanchored	24875	0.416298	0.509668
Unanchored_1386	Unanchored	24811	0	0.885857
Unanchored_1387	Unanchored	24804	0.012458	0.925738
Unanchored_1388	Unanchored	24796	0.946723	0.919342
Unanchored_1389	Unanchored	24785	0	0.872423
Unanchored_1391	Unanchored	24673	0.40933	0.407206
Unanchored_1392	Unanchored	24608	0.72646	0.92665
Unanchored_1393	Unanchored	24599	0.18282	0.467336
Unanchored_1394	Unanchored	24596	0	0.989714
Unanchored_1395	Unanchored	24589	0.332642	0.503518
Unanchored_1396	Unanchored	24587	0.393435	0.458535
Unanchored_1397	Unanchored	24521	0.72916	0.915664
Unanchored_1398	Unanchored	24487	0.383566	0.916895
Unanchored_1399	Unanchored	24469	0.289848	0.505292
Unanchored_1400	Unanchored	24443	0.734351	0.9156
Unanchored_1402	Unanchored	24289	0.501276	0.509943
Unanchored_1403	Unanchored	24269	0.320752	0.606205
Unanchored_1404	Unanchored	24212	0.239726	0.511936
Unanchored_1405	Unanchored	24167	0	0.986593
Unanchored_1406	Unanchored	24164	0	0.9695
Unanchored_1407	Unanchored	24118	0.048389	0.999876
Unanchored_1409	Unanchored	24039	0.360388	0.56633
Unanchored_1410	Unanchored	24005	0.74775	0.914018
Unanchored_1412	Unanchored	23997	0.424279	0.610618
Unanchored_1413	Unanchored	23965	0.377024	0.564991
Unanchored_1414	Unanchored	23956	0.43707	0.456712
Unanchored_1415	Unanchored	23915	0.37476	0.457203
Unanchored_1416	Unanchored	23856	0.37925	0.465543
Unanchored_1417	Unanchored	23793	0.389038	0.642794
Unanchored_1418	Unanchored	23702	0.360744	0.493418
Unanchored_1419	Unanchored	23673	0.362454	0.44084
Unanchored_1420	Unanchored	23647	0.784911	0.912758
Unanchored_1421	Unanchored	23606	0.345435	0.424977
Unanchored_1422	Unanchored	23487	0	0.977264
Unanchored_1423	Unanchored	23444	0.396664	0.653344
Unanchored_1424	Unanchored	23332	0	0.993142
Unanchored_1425	Unanchored	23317	0.353234	0.345242
Unanchored_1426	Unanchored	23313	0	1
Unanchored_1427	Unanchored	23208	0.399966	0.489228
Unanchored_1428	Unanchored	23155	0.455731	0.326323
Unanchored_1429	Unanchored	23140	0.381304	0.34771
Unanchored_1430	Unanchored	23112	0.164078	0.609337
Unanchored_1431	Unanchored	23078	0.319366	0.546841
Unanchored_1432	Unanchored	23007	0.400113	0.503499
Unanchored_1433	Unanchored	23000	0.023175	0.999043
Unanchored_1434	Unanchored	23000	0	0.894522
Unanchored_1435	Unanchored	22972	0.112359	0.631769
Unanchored_1436	Unanchored	22960	0.380417	0.463676
Unanchored_1437	Unanchored	22914	0.319338	0.507026
Unanchored_1438	Unanchored	22820	0.763355	0.917266
Unanchored_1439	Unanchored	22776	0.282766	0.508166
Unanchored_1440	Unanchored	22761	0.373418	0.499934
Unanchored_1441	Unanchored	22726	0.411353	0.645384
Unanchored_1442	Unanchored	22451	0.372071	0.611866
Unanchored_1443	Unanchored	22275	0.19516	0.61688
Unanchored_1444	Unanchored	22251	0.061348	0.999865
Unanchored_1445	Unanchored	22248	0.393851	0.428038
Unanchored_1446	Unanchored	22202	0.305932	0.482299
Unanchored_1447	Unanchored	22196	0.406848	0.977383
Unanchored_1448	Unanchored	22169	0.046148	0.999865
Unanchored_1449	Unanchored	22157	0.322531	0.583382
Unanchored_1450	Unanchored	22139	0.857078	0.918515
Unanchored_1452	Unanchored	22074	0.362524	0.49556
Unanchored_1453	Unanchored	22064	0.337261	0.566398
Unanchored_1454	Unanchored	21980	0	0.978344
Unanchored_1455	Unanchored	21895	0	0.988171
Unanchored_1456	Unanchored	21868	0.415009	0.504299
Unanchored_1457	Unanchored	21587	0.667655	0.924214
Unanchored_1459	Unanchored	21417	0.838018	0.880375
Unanchored_1460	Unanchored	21372	0.477236	0.388967
Unanchored_1461	Unanchored	21372	0	0.912175
Unanchored_1462	Unanchored	21270	0.414171	0.912835
Unanchored_1463	Unanchored	21109	0.685285	0.432943
Unanchored_1465	Unanchored	20754	0	0.99947
Unanchored_1466	Unanchored	20749	0.426547	0.446576
Unanchored_1467	Unanchored	20682	0.399739	0.510057
Unanchored_1470	Unanchored	20432	0	0.979395
Unanchored_1471	Unanchored	20371	0.445164	0.932404
Unanchored_1472	Unanchored	20359	0	0.560587
Unanchored_1473	Unanchored	20335	0.88261	0.909417
Unanchored_1474	Unanchored	20125	0	0.999652
Unanchored_1475	Unanchored	20000	0.228311	0.76345
Unanchored_1476	Unanchored	19681	0.324543	0.588893
Unanchored_1477	Unanchored	19570	0	0.919877
Unanchored_1478	Unanchored	19558	0.17564	0.548113
Unanchored_1479	Unanchored	19554	0	0.999949
Unanchored_1480	Unanchored	19523	0.408206	0.428059
Unanchored_1481	Unanchored	19344	0.020938	0.999897
Unanchored_1482	Unanchored	19191	0.029547	1
Unanchored_1483	Unanchored	18891	0.429592	0.377164
Unanchored_1484	Unanchored	18889	0.483905	0.467733
Unanchored_1485	Unanchored	18510	0.204873	0.535548
Unanchored_1486	Unanchored	18434	0.679868	0.558642
Unanchored_1487	Unanchored	18434	0	0.327818
Unanchored_1488	Unanchored	18128	0.37982	0.596812
Unanchored_1489	Unanchored	18056	0.570978	0.38148
Unanchored_1490	Unanchored	18000	0	0.996778
Unanchored_1492	Unanchored	17875	0	0
Unanchored_1494	Unanchored	17243	0.220856	0.838833
Unanchored_1495	Unanchored	17168	0.05196	0.712954
Unanchored_1497	Unanchored	17000	0.023295	0.949235
Unanchored_1498	Unanchored	16691	0	0.99982
Unanchored_1499	Unanchored	16395	0	0.999817
Unanchored_1500	Unanchored	16332	0	0.997428
Unanchored_1502	Unanchored	15957	0.217473	0.648493
Unanchored_1503	Unanchored	15762	0	0.945756
Unanchored_1504	Unanchored	15000	0.372892	0.599467
Unanchored_1505	Unanchored	14495	0	0.897068
Unanchored_1506	Unanchored	14000	0	1
Unanchored_1507	Unanchored	14000	0	0.999357
Unanchored_1508	Unanchored	13709	0	0.952805
Unanchored_1509	Unanchored	13000	0.193707	0.576923
Unanchored_1510	Unanchored	12972	0	0.974484
Unanchored_1511	Unanchored	12827	0	0.999688
Unanchored_1512	Unanchored	12000	0.084257	0.963583
Unanchored_1513	Unanchored	11049	0	1
Unanchored_1514	Unanchored	10995	0	0.966166
Unanchored_1515	Unanchored	10000	0.063606	0.8244
Unanchored_1516	Unanchored	8725	0	1
Unanchored_1517	Unanchored	8540	0	0.984778
Unanchored_1518	Unanchored	7000	0.034291	1
Unanchored_1519	Unanchored	6972	0	0.907631
Unanchored_1520	Unanchored	6590	0	0.988316
Unanchored_1521	Unanchored	6000	0.092015	0.989833
Unanchored_1522	Unanchored	6000	0	0.8295
Unanchored_1523	Unanchored	6000	0	1
Unanchored_1524	Unanchored	5235	0	0.951098
Unanchored_1525	Unanchored	4000	0.220555	1
Unanchored_1526	Unanchored	3345	0	0.693871
Unanchored_1527	Unanchored	3028	0	0.939894
Unanchored_1528	Unanchored	3000	0	0.842333
Unanchored_1529	Unanchored	2323	0	0.18037
Unanchored_1530	Unanchored	1000	0	1
Unanchored_1531	Unanchored	1000	0	0.997
Unanchored_1532	Unanchored	1000	0	1
Unanchored_1533	Unanchored	1000	0	0.631
Unanchored_1534	Unanchored	1000	0	1
Unanchored_1535	Unanchored	1000	0	0.987
